# Supplementary material for: Enhanced postoperative surveillance versus standard of care to reduce mortality among adult surgical patients in Africa (ASOS-2): a cluster-randomised controlled trial
Source: PubMed Central journal article supplement (PMC8440223; doi:10.1016/s2214-109x(21)00291-6), 2021-08-19

# THE LANCET

## Global Health

### Supplementary appendix 4

This appendix formed part of the original submission and has been peer reviewed. We post it as supplied by the authors.

Supplement to: The ASOS-2 Investigators. Enhanced postoperative surveillance versus standard of care to reduce mortality among adult surgical patients in Africa (ASOS-2): a cluster-randomised controlled trial. *Lancet Glob Health* 2021; published online Aug 18. [http://dx.doi.org/10.1016/S2214-109X\(21\)00291-6](http://dx.doi.org/10.1016/S2214-109X(21)00291-6).

b

**Effect of enhanced postoperative surveillance on mortality amongst adult surgical patients in Africa: A cluster randomised trial.**

The ASOS-2 Investigators

**Supplementary material**

**Table of Contents**

|                                                                                                                                                                                                                                                                                                                                  |           |
|----------------------------------------------------------------------------------------------------------------------------------------------------------------------------------------------------------------------------------------------------------------------------------------------------------------------------------|-----------|
| <b>Appendix. Members of the African Surgical OutcomeS-2 Trial (ASOS-2) group .....</b>                                                                                                                                                                                                                                           | <b>3</b>  |
| <b>Supplementary Material S1. ASOS-3 Protocol amendments .....</b>                                                                                                                                                                                                                                                               | <b>37</b> |
| <b>Supplementary Material S2. Broadcasting document .....</b>                                                                                                                                                                                                                                                                    | <b>43</b> |
| <b>Supplementary Material S3. Randomisation algorithm .....</b>                                                                                                                                                                                                                                                                  | <b>44</b> |
| <b>Supplementary Material S4. Postoperative surveillance bedside guide .....</b>                                                                                                                                                                                                                                                 | <b>45</b> |
| <b>Supplementary Material S5. Case record form: Control arm .....</b>                                                                                                                                                                                                                                                            | <b>46</b> |
| <b>Supplementary Material S6. Case record form: Intervention arm .....</b>                                                                                                                                                                                                                                                       | <b>47</b> |
| <b>Supplementary Material S7. Site initiation checklists.....</b>                                                                                                                                                                                                                                                                | <b>48</b> |
| <b>Supplementary Material S8. Definitions of the components of the secondary outcome ‘severe complications’ .....</b>                                                                                                                                                                                                            | <b>49</b> |
| <b>Supplementary Material S9. The ASOS-2 trial design .....</b>                                                                                                                                                                                                                                                                  | <b>52</b> |
| <b>Supplementary Material S11. Prespecified sensitivity and subgroup analyses .....</b>                                                                                                                                                                                                                                          | <b>54</b> |
| <b>Supplementary Table S1. Hospitals and participants recruited per randomisation wave in the trial .....</b>                                                                                                                                                                                                                    | <b>55</b> |
| <b>Supplementary Table S2. Hospitals recruited in the trial .....</b>                                                                                                                                                                                                                                                            | <b>56</b> |
| <b>Supplementary Table S3. Physician surgeons, anaesthesiologists and obstetricians, and the number of operating theatres in hospitals recruited in the trial.....</b>                                                                                                                                                           | <b>57</b> |
| <b>Supplementary Table S4. ASOS Surgical Risk Calculator Scores in participating patients .....</b>                                                                                                                                                                                                                              | <b>58</b> |
| <b>Supplementary Table S5. Number of postoperative surveillance interventions provided to high-risk patients .....</b>                                                                                                                                                                                                           | <b>59</b> |
| <b>Supplementary Table S6. Sensitivity analyses of the potential impact of unobserved outcomes on the primary and secondary effectiveness estimates, where individuals with unobserved outcomes were alternately assumed to be alive at discharge (censored at thirty days) or to have died in-hospital within 30 days .....</b> | <b>60</b> |
| <b>Supplementary Table S7. Per protocol analyses of enhanced postoperative surveillance implementation fidelity to decrease in-hospital mortality.....</b>                                                                                                                                                                       | <b>61</b> |

|                                                                                                                                                                                 |           |
|---------------------------------------------------------------------------------------------------------------------------------------------------------------------------------|-----------|
| <b>Supplementary Table S8. Per protocol analyses of enhanced postoperative surveillance implementation fidelity to decrease in-hospital severe complications and death.....</b> | <b>62</b> |
| <b>Supplementary Table S9. Stratified models for primary effectiveness outcome associated with enhanced postoperative surveillance.....</b>                                     | <b>63</b> |
| <b>Supplementary Table S10. Sensitivity analyses for primary effectiveness outcome associated with enhanced postoperative surveillance.....</b>                                 | <b>64</b> |
| <b>Supplementary Table S11. Sensitivity analyses for primary effectiveness outcome associated with enhanced postoperative surveillance for high-risk patients .....</b>         | <b>68</b> |
| <b>Supplementary Figure 1. The African Surgical OutcomeS-2 (ASOS-2) trial results.....</b>                                                                                      | <b>69</b> |

## Appendix. Members of the African Surgical Outcomes-2 Trial (ASOS-2) group

**Writing Committee:** Bruce M Biccard, Leon du Toit, Maia Lesosky, Tim Stephens, Landon Myer, Agya Prempeh, Nicola Vickery, Hyla-Louise Kluyts, Alexandra Torborg, Akinyinka Omigbodun, Adesoji Ademuyiwa, Muhammed Elhadi, Mohamed Elfagieh, Bernard Mbwele, Mpoki Ulisubisa, Lazaro Mboma, Daniel Z Ashebir, Mahlet Tesfaye Bahta, Hassen Mohammed, Mikiyas Teferi, Yakob Seman, Eugene Zoumenou, Adam Hewitt-Smith, Janat Tumukunde, Dolly Munlemvo, Atilio Morais, Apollo Basenero, Pisirai Ndarukwa, Nazinigouba Ouerdraogo, Maman Sani Chaibou, Mohyeddine Zarouf, Ahmed Rhassane El Adib, Veekash Gobin, Zimogo Sanogo, Youssouf Coulibaly, Zipporah Ngumi, Tarig Fadalla, Cynthia Lule, Venerand Barendegere, Isaac Smalle, Mustapha Bittaye, Ahmadou Lamin Samateh, Mahmoud Elfiky, Maher Fawzy, Wakisa Mulwafu, Vanessa Msosa, Lygia Lopes, Akwasi Antwi-Kusi, Sama Hamza, Patrice Forget, Dawid van Straaten, Rupert M Pearse

1. Prof Bruce M Biccard PhD, Professor and 2nd Chair, Department of Anaesthesia and Perioperative Medicine, Groote Schuur Hospital, Faculty of Health Sciences, University of Cape Town, South Africa
2. Leon du Toit MMed (Anaes), Department of Anaesthesia and Perioperative Medicine, Groote Schuur Hospital, Faculty of Health Sciences, University of Cape Town, South Africa
3. Maia Lesosky PhD, Division of Epidemiology & Biostatistics, School of Public Health & Family Medicine, University of Cape Town, South Africa.
4. Tim Stephens, Improvement Scientist // Nurse Researcher, Honorary Clinical Senior Lecturer // Florence Nightingale Scholar, Critical Care and Peri-operative Medicine Research Group, WHRI, Queen Mary University of London, United Kingdom.
5. Professor Landon Myer PhD, Division of Epidemiology & Biostatistics, School of Public Health & Family Medicine, University of Cape Town, South Africa.
6. Agya BA Prempeh FCA (SA), Department of Anaesthesia and Perioperative Medicine, Groote Schuur Hospital, Faculty of Health Sciences, University of Cape Town.
7. Nicola Vickery FCA(SA), Department of Anaesthesia and Perioperative Medicine, Groote Schuur Hospital, Faculty of Health Sciences, University of Cape Town, South Africa
8. Prof Hyla Kluyts DMed (Anaest), Department of Anaesthesiology, Sefako Makgatho Health Sciences University, South Africa
9. Alexandra Torborg FCA(SA), Discipline of Anaesthesiology and Critical Care, Nelson R. Mandela School of Medicine, University of KwaZulu-Natal, Congella, KwaZulu-Natal, South Africa
10. Prof Akinyinka Omigbodun FWACS, Professor of Obstetrics and Gynaecology, College of Medicine, University of Ibadan, Nigeria
11. Prof Adesoji O Ademuyiwa, FACS, Professor of Surgery (Paediatric and Surgical Epidemiology), Department of Surgery, College of Medicine, University of Lagos and Lagos University Teaching Hospital, Lagos, Nigeria
12. Muhammed Elhadi MBBCh, Faculty of Medicine, University of Tripoli, University Road, Furnaj, 13275 Tripoli, Libya
13. Prof Mohamed Ahmed Elfagieh FRCS MD, NCI, Misrata, Libya
14. Bernard Mbwele. MD, MSc, PhD Candidate, Birmingham University, Department of Epidemiology, University of Dar es Salaam - Mbeya College of Health and Allied Sciences (UDSM-MCHAS), P.O Box 608 Mbeya, Tanzania
15. Mpoki Ulisubisa MMed (Anaesthesia and Critical Care), Muhimbili University of Health and Allied Sciences, Dar Es Salaam Tanzania.
16. Lazaro Mboma MMed, Department of Surgery, Mbeya Zonal Referral Hospital, P.O Box 419 Mbeya, Tanzania
17. Prof Daniel Z Ashebir, Depart of Surgery, School of Medicine, CHS, Addis Ababa University, Ethiopia
18. Mahlet Tesfaye Bahta Cert(Cardiothoracic Surgery), Assistant Professor, Addis Ababa University, College of Health Science, School of Medicine, Department of Surgery, Ethiopia
19. Hassen Mohammed MPH, Director of Health Services Quality, Federal Ministry of Health, Addis Ababa, Ethiopia
20. Mikiyas Teferi DM, National Coordinator for Surgical Improvement Case Team, Ministry of Health, Ethiopia
21. Yakob Seman A MPH, Director General, Medical Services, Ministry of Health, Ethiopia
22. Prof Eugene Zoumenou, Faculté des Sciences de la Santé de Cotonou, Hôpital de la mère et de l'enfant, Lagune de Cotonou, Benin

23. Adam Hewitt-Smith MBBS, Lecturer, Department of Anaesthesia & Critical Care, Busitema University Faculty of Health Sciences, Uganda
24. Janat Tumukunde MMed (Anaesthesia), Anaesthesiologist, Makerere University, Kampala, Uganda
25. Dolly Munlemvo MD, Specialist in Anaesthesiology and Resuscitation, University Hospital of Kinshasha, Democratic Republic of Congo; Research Associate, Department of Anesthesiology and Pain Medicine, Nationwide Children's Hospital Columbus/Ohio, USA
26. Atilio Morais PhD, Cardiothoracic and Vascular Surgeon, Departamento de Cirurgias (Hospital Central de Maputo and Faculdade de Medicina, Universidade Eduardo Mondlane), Maputo, Moçambique
27. Apollo Basenero MBChB, Ministry of Health and Social Services Namibia, Private Bag 13198, Windhoek, Namibia, Namibia
28. Pisirai Ndarukwa PhD, Department of Public Health, University of KwaZulu Natal SA; Department of Health Sciences, Bindura University of Science Education, Zimbabwe
29. Professor Nazinigouba OUERDRAOGO, Chef du Departement d'anesthésie réanimation, CHU Yalgado Ouagadougou, Burkina Faso.
30. Maman Sani CHAIBOU, Anaesthesiologist and Chief of Department of Anesthesiology, Intensive Care and Emergency, National Hospital of Niamey, Republic of Niger
31. Mohyedine Zarouf MD, Hospital Mohammed V, Tangier, Morocco
32. Prof Ahmed Rhassane El Adib MD, Educational Manager of Marrakesh Simulation and Innovation in Health Sciences Center, Head of Anesthesia and Critical Care in Gynecology -Obstetrics Department Mother and Child Hospital, Mohammed VI University Hospital School of Medicine, Cadi Ayyad University, Marrakesh Morocco
33. Veeksah Gobin MD Anaesthesia, Ministry of Health and Wellness, Jawaharlal Nehru Hospital (JNH), Rose Belle, Mauritius
34. Prof Zimogo Sanogo, Chief of Department of Surgery, CHU du Point G, Faculté of Medecine, Bamako, Mali
35. Prof Youssouf Coulibaly, Professor and Chief of Department, Faculté de médecine de Bamako, Mali
36. Zipporah Ngumi, FFARCS, Chair Department of Anaesthesia, University of Nairobi School of Medicine, Kenya
37. Tarig Fadalla MBBS, Ribat Neurospine Center, Ribat University Hospital, The National Ribat University. Khartoum, Sudan.
38. Cynthia Iradukunda MBChB, Mbabane Government Hospital, eSwatini.
39. Vénérand Barendegere MMed (General Surgery), FCS-ECSA, Department of Surgery, Kamenge Military Hospital, Bujumbura, Burundi.
40. Isaac O Smalle MD MWACS, Division of Breast and Oncology, Connaught Hospital, Ag. Head Department of Anatomy, College of Medicine and Allied Health Sciences, University of Sierra Leone, Sierra Leone.
41. Mustapha Bittaye, Senior Lecturer Obstetrics & Gynaecology, University of The Gambia, The Gambia.,
42. Ahmadou L Samateh FWACS, Senior Lecturer in Surgery, University of The Gambia, The Gambia
43. Mahmoud Elfiky MD, Kasr Al Ainy Faculty of Medicine, Cairo University, Ali Ibrahim St, Manial, Cairo 11432.
44. Prof Maher Fawzy MD, Emeritus Professor of Anesthesia , ICU and Pain Management, Faculty of Medicine, Cairo University, Egypt
45. Wakisa Mulwafu PhD, Associate Professor, College of Medicine, Private Bag 360, Blantyre, Malawi.
46. Vanessa Msosa FCS(ECSA), General Surgeon, Kamuzu Central Hospital, P.O. Box 149, Lilongwe, Malawi
47. Professor Lygia Lopes, General surgeon, Clínica Sagrada Esperança, Luanda, Angola.
48. Akwasi Antwi-Kusi, FGCS, Senior Lecturer, Department of Anaesthesiology and Intensive Care, School of Medical Sciences, College of Health Sciences, Kwame Nkrumah University of Science and Technology, Kumasi, Ghana
49. Hamza D Sama, Maître assistant, Chef service anesthésie reanimation, CHU Sylvanus Olympio, 08 BP 8146 Lomé, Togo
50. Prof Patrice Forget PhD, Institute of Applied Health Sciences, Epidemiology group, School of Medicine, Medical Sciences and Nutrition, University of Aberdeen; Department of Anaesthesia, NHS Grampian, Aberdeen, United Kingdom.
51. Dawid EA van Straaten BA, Safe Surgery South Africa NPC, 5 14<sup>th</sup> Street, Parkhurst, Gauteng, 2193, South Africa.

52. Prof Rupert M Pearse MD(Res), Professor of Intensive Care Medicine, Queen Mary University of London, United Kingdom, EC1M 6BQ

**Steering Committee:** BM Biccard, H Kluys, M Lesosky, L Myer, L du Toit, P Forget, T Stephens, RM Pearse on behalf of African Surgical OutcomeS-2 (ASOS-2) Investigators

**Process Evaluation Team:** T Stephens, L du Toit, NJ Vickery, A Torborg, M Puchert, L Rolt, H Kluys, D van Straaten, RM Pearse, BM Biccard

**Other Central Trial Team Members:** D van Straaten, A Prempeh, K Schwebler, F Kabambi, T Mabotja

### **ASOS-2 Investigators:**

\*Hospital Lead Investigator

#### **Angola. National Leader: Lygia Lopes**

*Clínica Sagrada Esperança*

Lygia Lopes\*

Leandys Cobas

Albino Freitas

*Hospital Central Dr. António Agostinho Neto*

Maria Antunes\*

Bartolomeu Cabo

Domingos Paulo

Carlos Camongua

#### **Benin. National Leader: Eugene Zoumenou**

*Hôpital de Zone de Kandi*

Bodourin Dossou-Yovo\*

Chantal Segla

Mohamed Toko

*Centre Hospitalier Universitaire De Zone Abomey Calavi*

Yvette Avognon\*

Ossemi Marcos

Raymond Kintomonho

Onesime Demahou

Gisèle Hounsa

*Hôpital d'Instruction des Armées/ Centre Hospitalier et Universitaire de Parakou*

Julien Attinon\*

Roger Klikpezo

Aumar Dadjo

Dénis Fanou

*Hôpital Evangélique de Bembèrèkè*

Ethienne Yado\*

Timothé Gouroubéra

*Hôpital de zone Sakété*

Michel Noukounwoui\*

*Centre Hospitalier Universitaire Departemental Borgou Alibori*

Blaise Tchaou\*

Charles Tcheignonsi

Fifame Amadji

Francine Bossa

*Hôpital D'instruction Des Armées De Cotonou*

Fanou Lionelle\*

Nounagnon Gilbert

*Hôpital de Zone de Banikoara*

Gilberte Hounkpe\*  
Bachabi Fafana  
Néné Nguilu

*Hôpital De Zone De Mènonin*

Evelyne Gnele-Dedewanou\*

*CHD-Atacora*

Oswald Gbehade\*  
Romaric Tobome  
Adam Boukari  
Patrick Bakantieba  
Arouna Sambo

*Centre Hospitalier Universitaire de Zone Suru-Léré*

Hugues Chobli\*  
Elie Fassinou  
Aurore Zoglobossou

*HZ Malanville*

Valéry Adjignon\*

*Centre Hospitalier Universitaire Départemental de l'Ouémé et du Plateau*

Ernest Ahounou\*  
Djima Alao  
Roushdane Odérémi  
Afissatou Montairou

*Centre National Hospitalier et Universitaire Hubert Koutoukou MAGA*

Serge Mewanou\*  
Aïcha Tchomgang  
Urielle Agossou  
Fernand Soton  
Charbel Azanlin

*CHU-MEL Cotonou / CHU de la Mere et de L'enfant Lagune*

Eugene Zoumenou\*  
Lidwine Zomahoun

**Burkina Faso. National Leader: Nazinigouba OUEDRAOGO**

*Centre hospitalier universitaire de Tengandogo*

Rawéléguinbasba Armel Flavien Kabore\*  
Salam Savadogo  
Fatou Fleur Rosine Sanou  
Farid Belém  
Victoria Hien  
Cheik Tidiane Hafid W Bougouma  
Sie Ahmed Ouattara

*Hôpital de District de Nomgr-Massom*

Mariam Bambara Kabore\*

*Centre Hospitalier Universitaire Yalgado Ouedraogo*

Ouedraogo Nazinigouba\*  
Papougnezambo Bonkougou\*  
Martin Lankoandé\*  
Mireille Traoré\*  
Patrick Sawadogo\*  
Inès Wenmenga\*  
Boureima Kinda  
André Simporé

*Hôpital de district de Boulmiougou*

Christian Sapo\*

*Centre Hospitalier Universitaire de Bogodogo*

Salah Idriss Traore\*  
Haoua Dipama  
Lydie WR Kaboré  
Salifou Napon  
Télesphore G Kaboré  
Arouna Louré  
Pélagie PP Tondé  
Christian Zoundi

*Centre Hospitalier Régional de Koudougou*  
Martin Lankoande\*  
Harouna Sanou

**Burundi. National Leader: Venerand Barendegere**

*Kibuye Hope Hospital*  
Gregory Sund\*  
Alliance Niyukuri

*Kamenge Military Hospital*  
Remy Ndikumana\*  
Venerand Barendegere  
Carlos Nsengiyumva

*Centre Hospitalo-Universitaire de Kamenge*  
Axel Kwizera\*  
Jean-Claude Niyondiko\*

**Democratic Republic of the Congo. National Leader: Dolly Munlemvo**

*Cliniques Universitaires de Kinshasa*  
Adolphe Manzanza Kilembe\*  
Jean Pierre Mwema Ilunga  
Nehema Hailemariam Sarah  
Gabriel Mubobo Makeya

*El Rapha Clinic*  
Idesbald Mwebe Mwepu\*  
Ted Botawaosenge Likongo

*Cliniques Ngaliema*  
Richard Kapela Mvwala\*  
Raphael Nzau Kapend Mubunda  
Noellie Kanka Mukuna

*Hopital General de Reference de Kinshasha*  
Julie Djondo Pembe\*  
Nicolas Lumuanga Ndaye

*Centre Nganda*  
Eric Bibonge Amisi\*  
Mike Ilunga Madika

*Médecins de Nuit*  
Joe Kembo Lungela\*  
Didier Ndonda Mayemba

*Hopital Sino Congolais*  
Philomene Mamba Diyoyo  
Alex Mbo Ngalala\*

*Hopital Diamant*  
Martin Mamba Mukenga\*

*Hopital General de Kintambo*  
Patricia Tito Kabuni  
Dany Bolimo Mpoto\*  
Herve Inesku Mole  
Louise Keby  
Oria Andavo Buti



*Centre Hospitalier du Mont Amba*  
Anselme Phaka\*  
Belinda Mayenge

*Hopital Biamba Marie Mutombo*  
Jean Jacques Kabuley Kalongo\*

*Hopital General de Ngiri-Ngiri*  
Timothe Kemfuni Mawisa\*  
Rodrigue Tondo Ngwizani

*Centre Hospitalier Akram / Pont Matete*  
Kuyala Leya\*

*Matter Dei*  
Dieudonne Kisile Sanduku\*  
Timothe Nkemfuni Mawisa

*Hopital Roi Bodoïn Ler*  
Coco Nseke Mfumu\*  
Mbuta Bolenge

*La Borne*  
Desire Kinzenzengu Kabuce\*  
Patrick Kintieti

*Centre Hospitalier d'Etat de Matete*  
Amelia Mbuluku\*

*Hôpital d'Etat de Makala*  
Vicky Mahuwa\*  
Tharcice Khonde Mabiala

*Hôpital 12e Rue Limete Petit Blvd Indus / Hôpital Voici l'Homme*  
Guilain Ngoy\*

*Mere et Enfants Barumbu*  
Patrick Boloko  
Nono Mazangama Mvwama\*  
Jose Kengbanda

*HGR Masimanimba*  
Pitchou Mushimbonga\*  
Blaise Kuhapala

*HGR De Kikwit*  
Nzosani Marcel\*  
Kienze Guylain\*

*HGR Mosango*  
Gerard Mboma\*

*Cliniques Universitaires de Lubumbashi*  
Sandra Zalambo Sagboze  
Michel Muteya Manika\*

*Heal Africa Goma*  
Jean Pierre Mumbere Kigayi\*

*CH Biopharma BKV*  
Roger Mukanire Cishugi\*

*HGR Nyantende*  
Placide Buhendwa Mugisho\*

*HGR Panzi*  
Roger Baguma\*

*Hôpital Dipumba*

Moïse Kongolo  
Michel Mandungu Mbayabu\*

*Hôpital Bonzola*  
Crispin Mukendi Muamba\*  
Edmond Banema Kapinga  
Vasco Ngolela Kapinga

*Hôpital Presbytérien de Mbujimayi*  
Guylain Tshimanga Nsumpi\*

*Polyclinique de Mbujimayi*  
Patrick Kanda Odia\*

*Hopital Ime/Kimpese*  
Salomon Bingidimi\*  
Gilbert Kpengbemale  
Desire Hubert Bofunga Bosonga Imposo

*HGR Kinkanda*  
Patricia Matondo\*  
Servet Lelo  
Jeremie Kalambayi

*Grace a Dieu*  
Patrick Kanda Odia\*

**Egypt. National Leaders: Mahmoud Elfiky and Maher Fawzy**

*Cairo University Hospitals*  
Maher Fawzy\*  
Mahmoud Elfiky

*Suez Canal University Hospitals*  
Mohamed Abdel-Ghaffar\*  
Abdelrahman Soliman  
Mostafa Abdelrahman

*Alexandria University / El Shatby University Hospital*  
Sameh Shehata\*  
Alia Rabee  
Mohamed Abou Heba  
Mohamed Rabei Abdelfattah  
Tamer Ahmed Maher Ghoniem

*Tanta University*  
Sherif M.K. Shehata\*  
Mohamed Lotfy  
Ahmed ElHaddad

**Ethiopia. National Leaders: DZ Ashebir, Mahlet Tesfaye Bahta, Hassen Mohammed, Mikiyas Teferi, Yakob Seman**

*Dil Chora Referral Hospital*  
Rahel Assefa\*  
Abdurahman Gelmo  
Seifu Alemu  
Brook Damtatchew  
Merid Mersha  
Yaekob Chemere  
Samuel Fekadu  
Sintayehu Regasa  
Bonsa Sileshi  
Desalegn Wosen  
Rebira Adamu

*Maddawalabu University Goba Referral Hospital*  
Zewude Gudisa\*  
Kebebe Bekele\*  
Alealign Tasew  
Habtamu Gezahegn

Daniel Atlaw  
Damtew Solomon  
Habtemariam Gebresillasie  
Girmaye Tesfaye  
Negussie Sarbecha  
Biniyam Sahiledengle  
Kenbon Seyoum  
Gemechu Ganfure  
Yohannes Tekalegn

*Jimma University Institute of Health*  
Gersam Mulugeta\*  
Teshome Bacha

*Yirgalem General Hospital*  
Musefa Redwan\*  
Eyasu Muse  
Girma Nina  
Bizuneh Sime  
Addisalem Tadege  
Anbesse Jima

*Dessie Referral Hospital*  
Fassil Mihretu\*  
Yesuf Ahmed  
Bekele Debebe  
Abdureuf Misgea  
Amare Agmas

*Debre Birhan Comprehensive Specialized Hospital*  
Fitsum Kifle\*  
Kokeb Desita  
Abebe Addise  
Dagim Shimelash  
Shitalem Tadesse  
Bezaye Zemedkun  
Peniel Kenna

*Wolaitta Sodo University Teaching and Referral Hospital*  
Temesgen Ayichew\*  
Shibiru Sendaba

*Tibebe Ghion Specialized Hospital*  
Gosa Tesfaye\*

*Ambo University Referral Hospital*  
Desalegn Abdisa\*  
Abebe Megersa  
Wendwosen Abayne

*Ayder Comprehensive Specialized Hospital*  
Haftom Berhane\*  
Reiye Esayas

*Alert Hospital*  
Abdurezak Ali\*  
Kindie Moges  
Jemal Ahmed

*Debre Markos Referral Hospital*  
Ayenew Yirdie\*  
Abinet Sisay  
Tebikew Gashu

*Aksum University Comprehensive Specialized Hospital*  
Bereket Gebremeskel\*  
Girmay Fisseha  
Mebrahtu Abay  
Degena Bahrey

Assefa Hika

*Menelik II*  
Nugusu Ayalew\*  
Dagmawi Workneh  
Daniel Teferi

**Gambia. National Leader: Mustapha Bittaye, Ahmadou Lamin Samateh**

*Kanifing General Hospital*  
Alagie Manneh\*

*Bwiam General Hospital*  
Kitabu Jammeh\*  
Abdoulie Keita\*

*Farafenni General Hospital*  
Ebrima Kanteh\*  
Sarjo Ceesay

*Bansang Hospital*  
Momodou Nyassi\*

*Bundung Maternal Child Health Hospital*  
Landing N Sanyang\*  
Omar Jallow

*Edward Francis Small Teaching Hospital*

Mustapha Bittaye  
Ahmadou Lamin Samateh  
Charles Roberts\*  
Patrick Idoko  
Kebba Marenah  
Masirending Njie  
Musa Marena  
Karamba Suwareh  
Simon Boissey  
Fatoumatta Jarjusey  
Awa Jah  
Awa Sanyang  
Dado Jabbi  
Kajali Camara  
Armando Correa  
John Jabang  
Lamin Jaiteh  
Lamin Dampha  
Aminata Manneh  
Abdoulie Keita  
Baboucarr Sowe  
Abdoulie Bah  
Edrisa Jawo  
Victoria Okoje  
Momodou Baro  
Yaya Bah  
Mustapha Njie  
Sainabou Mbowe

**Ghana. National Leader: Akwasi Antwi-Kusi**

*Greater Accra Regional Hospital*  
Evans Atito-Narh\*  
Adwoa Wilson

*Holy Family Hospital, Berekum*  
Romeo Hussey\*  
Emmanuel Okine  
Jemima Kwarteng  
Ridge Ntiamoah  
Samuel Dadzie  
Mark Aseti

Naa Sowah  
Akosua Appiah  
Charles Bankah

**Kenya. National Leader: Zipporah Ngumi**

*Kenyatta National Hospital*

Zipporah Ngumi  
Patrick Mburugu\*  
Thomas Chokwe  
Patrick Olang  
Vernon Gacii  
Susane Nabulindo  
Antony Gatheru  
Timothy Mwiti  
Caroline Mwangi  
Julius Muriithi  
Daniel Ojuka  
Omondi Ogutu  
Evans Masitara  
Mohamed Chaudhry  
Reuben Kamundi  
Annmarie Kangangi  
Thomas Massaquoi  
Stephen Takow  
Felister Moraa  
Aziz Munubi

*Kiambu Level V Hospital*

Moses Kimani\*  
Adili Wobenjo  
Linda Nguu

*Kisii Teaching and Referral Hospital*

Vincent Omeddo\*  
Rose Malaba  
Ambrose Nabwana  
Anita Mwanicha  
Alexandria Mugaa

*Mater Misericordiae Hospital*

John Wamwaki  
Joyce Chege  
Seymour Sinari  
Andrew Ndonga\*

*Moi Teaching and Referral Hospital*

Rose Shitsinzi\*  
Walter Akello  
Winfred Kimani  
Elisha Kirwa  
Seno Saruni  
Andrew Wainaina  
Ernest Nshom  
Aidah Kenseko

*Naivasha District Hospital*

Kizito Shisanya\*  
Purity Wanjiru  
Julliah Cherotich  
Judy Kimutai  
Benson Wahome  
Grace Wangui  
Dennis Wamalwa  
Stephen Mwangi  
John Chege  
Tabitha Wanjiku

*Nakuru Level 5 Hospital*

Carolyne Njoki\*

Wachira Waititu  
Conrad Ambani  
Samuel Murimi  
Sharon Waithira  
Nilson Mouti  
Collins Kibet  
John Kibet  
Virginia Sokobe  
Beatrice Jeymah  
Antony Kamadi  
Faith Gichuri  
Steve Moses  
David Wasike  
Favours Adeya

*JOOTRH Level 6 Hospital*  
Caesar Bitta\*  
Stephen Ogendo\*

*Muranga County Hospital*  
Killian Kariuki\*

**Libya. National Leaders: Muhammed Elhadi, Mohamed Elfagieh**

*Benghazi Medical Center*  
Taha Abubaker\*  
Fatima Elkhfeefi  
Soha Younis Hasan  
Amal Alttaira  
Imbarkah Elmraied  
Rim Wishah

*Tobruk Medical Center*  
Ahmad Bouhuwaish\*  
Munyah Alriqeeq  
Mabruka Omar  
Ashraf Samer  
Aml Aemeesh

*National Heart Institute*  
Bushray Almiqlash\*  
Abdulsalam Alshuhoumi  
Rayet Al-islam Ben Jouira  
Amaal Dier  
Essra Gebril

*Mietiga Hospital*  
Mohammed Albashri\*  
Marwa Morgom  
Mohammed Alawami  
Eman Shawesh  
Abdullah Almabrouk  
Moaz Alwarfalli  
Nagja Abeid  
Anis Buzreg  
Ans Malek  
Ameerah Abayu  
Butaina Abdulhafith

*Medical Care Clinic*  
Malek Abudsnnuga\*  
Salsabil Albuaiishi

*Sabha Medical Center*  
Mohammed Abdelkabir\*  
Sana Moussa  
Marwa Alfitori  
Mabroukah Azbeda  
Hajar Alamin  
Ejmeya Barka

Omlsaad Mosbah  
Rema Abdasalam  
Miftah Hiyoum  
Maryam Abd allateef  
Ibrahim Altomi  
Mahdi Alsakloul  
Ekhlal Karami

*Aljalla University Hospital Benghazi*

Khaled Elgazwi\*  
Adel Elgazwi\*  
Ibrahim El-busif  
Safa Owhida  
Almahdi Eltwati  
Samah Elakeili

*AboSleem Trauma Hospital*

Hdaya BenAbdalla\*  
Taha Suliaman  
Fatima Ali Abokhzam  
Mohaned Isa  
Mohammed Huwaysh  
Asma Bourawi

*Tripoli Central Hospital*

Ahmed Msherghi\*  
Ahmed Elusta  
Sultan Ahmeed  
Wesal AlFighi Hassan  
Mouadah Ali Altayr  
Mohamed Addalla  
Abrar Geddeda  
Kheria Khoja  
Muaad Etturki

*Tripoli University Hospital*

Ahmed Elhadi\*  
Ibrahim Ellojli  
Anshirah Shuwayyah  
Ahmed Elfaghih  
Malak Alduwayb

*Aljalla Maternity Hospital*

Ahmed Msherghi\*  
Amira Mohamed  
Ala Khaled  
Nouran Aljadi  
Elham Bareig

*Zliten Hospital*

Mohamed Aleiyan\*  
Wedad Aboubreeq  
Soliman Alkasssem  
Sami Ashour  
Hayat Ben Hasan  
Najat Ben Hasan  
Ali Yahya

*Gheryan Hospital*

Akram Alkaseek\*  
Hoda Elhaddad  
Ayyah Alqaarh  
Ahlam Brish

*Elkhadra Hospital*

Omar Abugassa\*  
Hazem Ahmed  
Amera Ellafi  
Shoukrie Shoukrie  
Nawal Aldokali

Aws ElGammudi

*Al Hawari General Hospital*

Kais Alzubaidy\*  
Mohammed Albaraesi

*Mislata Hospital*

Wedad Abouruwes  
Marim Albakuri\*  
Sabria Almuammari

*Misrata Medical center*

Esam Alsaghair\*  
Fatheia Alreshi  
Hassan Badi  
Rabiee Alfetoey

*National Cancer Institute*

Mohamed Elfagieh  
Naji Zubia\*

*Al-Zawia Teaching Hospital*

Sumayyah Bahroun\*  
Abdulmueti Alhadi

**Malawi. National Leader: Wakisa Mulwafu, Vanessa Msosa**

*Queen Elizabeth Central Hospital*

Wakisa Mulwafu\*  
Palesa Chisala\*  
Edward Kommwa  
Lusayo Simwinga  
Agness Chalira

*Kamuzu Central Hospital*

Vanessa Msosa  
Precious Kachitsa  
Onias Mtalimanja

**Mali. National Leaders: Zimogo Sanogo, Youssouf Coulibaly**

*Chu Gabriel Toure*

Adégné Togo\*  
Bakary Dembele  
Djibo Diango  
Moussa Samake  
Youssouf Traore  
Louis Traore

*Centre Hospitalier Universitaire Du Point G*

Zimogo Sanogo  
Youssouf Coulibaly  
Drissa Traoré\*  
Moussa Sissoko\*  
Moussa Camara\*  
Adama Koita  
Sekou Koumaré  
Omar Sacko  
Mahamadou Coulibaly  
Lamine Soumaré  
Soumaïla Keita  
Sidiki Keita  
Hamadoun Dicko  
Boubacar Diallo  
Boureima Bengaly  
Mohamed Keita  
Siaka Diallo  
Drissa Ouattara  
Nouhoun Ongoiba  
Seydina Beye



Honoré Berthe  
Mamadou Diakite  
Mamadou Sima

*Hôpital de Tombouctou*  
Ongoïba Oumar\*

*Hôpital Fousseyni Daou de Kayes*  
Sogoba Gaoussou\*  
Issaga Traoré  
Sidy Sangaré  
Doua Kanté  
Lassana Cissé

*Hôpital Hangadoumbo Moulaye Touré De Gao*  
Thiam Souleymane\*

*Hôpital Hangadoumbo Moulaye Touré De Ga*  
Keita Koniba\*

**Mauritius. National Leader: Veekash Gobin**

*Flacq hospital*  
Divyanand Jankee  
Ashveen Puryag  
Meetheesh Abeeluck\*  
Senthil Beemadoo  
Yashraj Deenoo  
Abhisek Gourea  
Munawwara Makoon  
Hemanshu Rambojan  
Varun Seewoo\*  
Beeharry Shanjugsingh  
Kevin Viraswami

*Jawaharlal Nehru Hospital*  
Ashwant Bhugwandass  
Shehzaad Joomye\*  
Bibi Deelawar

*Sir Seewoosagar Ramgoolam National Hospital*  
Sajid Aungraheeta  
Vakil Leelodharry\*  
Sirsingh Bhajoo  
Luckshmanraj Mungur\*

*Wellkin Hospital*  
Gini Batra  
Subha Gaya\*  
Yoshvin Sunnassee  
Shailendra Petkar

*Clinic Muller*  
Sundaresan Maiyalagan\*  
Julien Chong  
Adil Mohit  
Khushyant Mungar  
Kevin Ramlochun  
Jamie Sim  
Desai Sneha  
Shankaran Vinayagam

*Victoria Hospital*  
Manpreet Rajcoomar\*  
Rishi Seetaram

*Dr AG Jeetoo Hospital*  
Vishaal Kissoon  
Yan Tseung  
Mohamed Aboobakar

Nitish Fokeerah\*  
Ravi Ramsewak  
Jayprakash Gopall

**Morocco. National Leader: Mohyeddine Zarouf and Ahmed Rhassane EL ADIB**

*Hôpital Mohammed VI / CHU Tanger*

Hicham Sbai\*  
Labib Smail  
Ait Laalim Said  
Motaai Youssef

*Hôpital des spécialités CHU Rabat*

Mouhssine Doumiri\*

*Hôpital Ibn Sina CHU Rabat*

Mustapha Alilou\*  
Nora Farnaoui

*Hôpital militaire d'instruction Rabat*

Mustapha Bengghir\*  
Abdelghafour Elkoundi  
Abdelhamid Jaafari  
Abderhmann Elwali  
Mohammed Meziane  
Walid Atmani

*CHU Marrakech - Hôpital Mère-Enfant, Centre Hospitalier Universitaire Mohammed VI Marrakech*

Ahmed Rhassane El Adib  
Houssam Rebahi  
Hajar Chichou  
Safae Zarouf  
Abderraouf Soummani

*CHU Marrakech - Hopital Arrazi, CHU Mohammed VI*

Aboulhassan Taoufik\*  
Meryem Essafti  
Aminata Oumou Traore  
Hamzaoui Hamza

*CHU Fes*

Adnane Berdai\*

**Mozambique. National Leader: Atilio Morais**

*Hospital Central Da Beira*

Nelson Mucopo\*

*Hospital Central de Maputo, Faculdade de Medicina, Universidade Eduardo Mondlane*

Atilio Morais\*  
Machado Banze  
Mouzinho Saide  
Tomas Sitei  
Artur Machava

*Pemba Provincial Hospital*

Antonio Carlos\*  
Amilton Guidione  
Antonio Saide de Carvalho

*Hospital Geral de Mavalane*

Natacha Gemo\*

*Hospital Provincial de Xai-xai*

Samiro Sema Camal\*

*Hospital Provincial de Chimoio*

Arsénio Cuna\*

*Hospital Central de Quelimane*

Ornelos Madeira\*  
Ladino Assuade

*Hospital Central de Nampula*  
Dercio Amde Fernandes\*  
Dulce Alexandre Machavae Fernandes

*Hospital Provincial de Lichinga*  
Mandua Sebastião\*

**Namibia. National Leader: Apollo Basenero**

*Otjiwarongo State Hospital*  
Paidamoyo Mandudzo\*  
Sandra Kapepiso

*Walvis Bay District Hospital*  
Martha Ntinda\*

*Outapi Hospital*  
Hazel Mavesere\*

*Intermediate Hospital Oshakati*  
Ruben Nailonga\*  
Immanuel Uukonga  
Uutoni Nakanyala  
Lavinia Johannes  
Adrian Haruzvi  
Chris Terblanche  
Natangwe Shimenda  
DelwinaKatjipu  
Hilma Shalimba

*Opuwo District Hospital*  
Hilma Katangolo\*

*Intermediate Hospital Katutura*  
Ike Ndjoze\*

*Khorixas District Hospital*  
Juliah Kaweendwa\*

*Onandjokwe State Hospital*  
Mutombo Ndaie  
Peter Njuki\*  
Akutu Munyika

*Windhoek Central Hospital*  
Pueya Nashidengo\*  
Johanna Kandjumbwa  
Lahia Lipumbu

*Engela District Hospital*  
Matti Kandjimi  
Bernard Sikombe\*

*Mariental State Hospital*  
John Oyedele\*  
Mapumba Mulolo\*

*Luderitz District Hospital*  
Ali Mbuyi\*

*Outjo District Hospital*  
Cedia Tjihoto\*

*Tsumeb District Hospital*  
Beata Siteketa\*  
Beata Kaholongo

*Oshikuku Hospital*  
David Tjiyokola\*  
Tawanda Mhene  
Archbald Masiambiri

*Gobabis State Hospital*  
Ayoub Shekimweri\*  
Diana Shilomboleni  
Mbaundju Kandjii  
Leonard Kabongo  
Cholastic Hangero

*St Mary's Hospital Rehoboth*  
Daylight Manyere\*  
Charlotte Kauraisa  
Learnmore Garanowako  
Michael Tune  
WilliamDeKlerk  
Benvenue Ndolo  
Maria Angula  
Ndapewoshali Hishekwa  
Elizabeth Nandjendja  
Elsabe Tsauses  
EuniceMouton  
Kudzai Katandawa  
Sophia Bruwer  
Jaydee Van Staden

**Niger. National Leader: Maman Sani CHAIBOU**  
*Centre De Sante De La Mere Et De L'enfant Diffa*  
Moussa Sirfi\*

*Centre Hospitalier Regional, Agadez*  
Fouma Djibo\*

*Centre Hospitalier Régional de Diffa*  
Moutari Mahaman\*

*Centre Hospitalier Régional de Maradi*  
Adakal Ousseini\*  
Maikassoua Mamane  
Abdoulaye Mahaman Bachir

*Centre Hospitalier régional de Tahoua*  
Maikassoua Mamane  
Maman Noury Hamissou Souley

*CHR Poudriere / Centre hospitalier regional de Niamey*  
Rekia Idrissa\*  
Moussa Ichaou  
Amina Saley  
Abdoulay Seyni  
Sahabi Amadou

*District sanitaire de Konni / Hopital de District de konni*  
Mahamane Sani Mahamane Laminou\*  
Issoufou Moustapha Camara\*

*Hôpital National de Niamey*  
Moussa Gagara  
Hadjara Rabiou Daddy

*Hopital National de Zinder*  
Harissou Adamou\*  
Ibrahim Amadou Magagi  
Oumarou Habou

*Hopital National Lamorde de Niamey*  
Sabo Ramatou

**Nigeria. National Leader: Akinyinka Omigbodun, Simbo Amanor-Boadu [†],**

*Lagos University Teaching Hospital*

Olufemi Bankole\*  
Bosede Afolabi  
Dapo Osinowo  
Ayodeji Oluwole  
Muyiwa Rotimi  
Ibironke Desalu  
Rufus Ojewola  
Bolaji Mofikoya

*National Hospital Abuja*

Jamiu Adebisi  
Temitope Babalola  
Mansur Muhammad  
Afeez Aruna  
Maryrose Osazuwa  
Muhammad Mahmud\*  
Ayodeji Yusuf  
Isiaka Lawal

*University College Hospital Ibadan*

Tinuola Adigun  
Babatunde Osinaike  
Olayinka Eyelade\*  
Akinyinka Omigbodun  
Olayinka Ogunbode  
Olusola Idowu  
Taiwo Lawal  
Temidayo Ogundiran  
Olayiwola Shittu  
Omobolaji Ayandipo

*University of Abuja Teaching Hospital*

Olumide Akitoye  
Bissallah Ekele  
Godwin Akaba  
Stephen Edino\*  
Terkaa Atim  
Zumnan Songden\*  
Akitoye Adeleke  
Owoicho Okochi  
Sunday Akeju  
Ernest Ukpoju

*Abubakar Tafawa Balewa University Teaching Hospital*

Saidu Kadas\*  
Rabiu Mohammed\*  
Abubakar Ballah  
Tella Olalekan  
Kefas Bwala  
Mohammed Adamu  
Adamu Isa

*Ahmadu Bello University Teaching Hospital*

Euphemia Ugwu  
George Mukoro  
Muhammed Ahmed  
Gideon Akafa  
Ahmad Lawal  
Daniel Nwoye  
Michael Odigbo  
Zulaihatu Sarkin-Pawa  
Tunde Sholadoye  
Benjamin Fomete  
Hamisu Yakubu  
Abdulkadir Kabiru  
Samaila Timothy

Ali Yusuf  
Rabiu Mohammed  
Tasiu Saadu  
Babangida Mohammed  
Abdulghaffar Yunus  
Ganiyat Olagunju  
Muhammad Aminu  
Mohammad Idris  
Elizabeth Nwasor\*  
Musliu Tolani  
Saidu Yakubu\*  
Nasiru Dalhat  
Samuel Gana  
Talent Adike

*Babcock University Teaching Hospital*

Benjamin Nkemjika  
Omotayo Salami\*  
Adekunle Akadri  
Bukola Olayinka  
Clement Onuoha

*Federal Medical Centre, Azare*

Umar Usman Jamaare\*  
Auwalu Saminu Jibrin  
Sani Giade Abdullahi  
Ibrahim Ishaku

*Federal Medical Centre, Jabi, Abuja*

Amechi Ezike\*  
Olatunde Olawoye  
Emmanuel Ugwu  
Christopher Ukah  
Abolade Olugbenga  
Nwachukwu Chidiebere  
Nasiru Abdulraman  
Adebiyi Olusegun  
Alisa Halisa  
Semiat Yusuf  
Jamila Salisu  
Chidiebube Okoro  
Abdul Suleiman  
Fabian Onowighose

*Federal Medical Centre, Lokoja*

Olatunde Alabi\*  
William Adeyemi  
Jelili Salau  
Jones Taiwo  
Nnaemeka Nwafulume  
Taiye Ibiyeye  
Edith Agu  
Ayodeji Danboy  
James Abdulazeez

*University of Benin Teaching Hospital, Edo State*

Osayomwanbo Osaheni\*  
Ifunanya Obaseki  
Lateef Kehinde  
Osawemwenze Monday  
Stanley Nte  
Adesuwa Agboifo  
Omajuwa Dawodu  
Precious Orhiere  
David Atiti

*University of Ilorin Teaching Hospital*

Israel Kolawole\*  
Olawale Ojo  
Afusat Olabinjo

Olufemi Ige  
Beatrice Ogunyemi  
Olusola Oladosu  
Kikelomo Adesina  
Sulaiman Agodirin  
Asimiyu Shittu

*Federal Medical Centre, Yola*  
Abdulrahman Mohammed\*

*Afe Babalola University Multi-speciality Hospital, Ado Ekiti*  
Samuel Fayose  
Ademola Adeyeye\*  
Akinola Akinmade  
Taiwo Ajayi

*Ladoke Akintola University Teaching Hospital, Ogbomoso*  
Adeolu Adeoye  
Temidayo Bobo  
Kola Owonikoko\*  
Taiwo Akinloye

*University of Maiduguri Teaching Hospital*  
Audu Idrisa\*  
Sadiq Adamu  
Ahmed Nuhu  
Nuhu Ali  
Olayinka Adewunmi  
Stephen Nwankwor

*University of Port Harcourt Teaching Hospital*  
Olubusola Alagbe-Briggs\*  
Amabra Dodiya-Manuel  
Bisola Onajin-Obembe  
Bright Obasuyi  
Richard Echem  
Ihuoma Mike-Elechi  
Job Otokwala

*Nigerian Navy Reference Hospital, Calabar*  
Abdullateef Abdulazeez\*  
Chabiya Bala  
Eziamaka Eze  
Elizabeth Ani  
Uchenna Okeke  
Dominica Adebayo

*Jos University Teaching Hospital*  
Benjamin Ugwu\*  
Samuel Nuhu\*  
Henry Embu\*  
Erdo Isamade  
Chinedu Obikili  
Amaka Ocheke  
Solomon Peter  
Donald Orshio  
Peter Onuminya  
Jack Okopi

*Aminu Kano Teaching Hospital*  
Lofty-John Anyanwu\*  
Abdurrahman Sheshe  
Sani Aji  
Mamuda Atiku  
Raphael Attah  
Abubakar Muhammed  
Rasaki Oseni  
Halima Salisu-Kabara

*University of Uyo Teaching Hospital*

Mark Edubio\*  
Catherine Eyo  
Isaac Udo\*

*Federal Teaching Hospital, Ido Ekiti*

Adebayo Adeniyi\*  
Toluwalope Ariyo  
Olajide Gabriel  
Tesleem Orewole\*  
Salawu Idris  
Idowu Adebara  
Abiodun Okunlola  
Akinwale Akinbade  
Oluwasesan Afolabi  
Adewumi Bakare  
Olabisi Adeyemo

*Federal Medical Centre, Umuahia*

Nnabuike Ojiegbe\*  
Charles Mbamba  
Paul Ngwu  
Frank Imahigbe  
Emmanuel Okoroji  
Iloh Ikenna

*Yariman Bakura Specialist Hospital, Gusau*

Abidemi Oyaromade\*  
Mohammed Bello  
Usman Muhammad  
Emeri Mbah  
Hyacinth Okereke  
Almustapha Aminu  
Anthony Ahmadu

*State Specialist Hospital Maiduguri Borno state*

Nankat Joseph\*  
Saliyu Bura  
Chukwuka Nwezoku  
Manu Bwala  
Meshach Philips  
Abubakar Usman  
Emmanuel Filibus  
Zara Umate  
Nwabuoke Chukwuka  
Ahmed Nuhu  
Watakiri Ibrahim  
James Nggada  
Ali Izge  
Musa Ismail

*Obafemi Awolowo University Teaching Hospitals Complex, Ile-Ife*

Simeon Olateju\*  
Fred Ige-Orhionkpaibima  
Adedapo Adetoye  
Olurotimi Aaron  
Jeremiah Abimbola  
Folayemi Faponle  
Olumuyiwa Ajayecoba

*University of Medical Sciences Teaching Hospital Complex, Ondo*

Akinwumi Olakanmi\*  
Oluseye Ajayi  
Ayotolu Ajayi  
Victor Ogunmola  
Oluwafunke Olakanmi  
Adam Kuranga

*Federal Medical Centre, Gusau*

Yetunde Aremu-Kasumu\*  
Kamil Shoretire\*



Peter Enesi  
Jimoh Buraimoh  
Kabiru Muhammad  
Sophia Baidoo  
Patrick Okoli  
Azeez Adigun  
Ekene Ezeonye  
Kabir Isa

*Federal Medical Centre, Katsina*

Aliyu Farinyaro\*  
Suleiman Baba  
Umar Abdulmajid  
Aisha Abdurrahman  
Ogochukwu Obi

*Mater Misericordiae Hospital, Afikpo, Ebonyi State*

David Ama\*  
Ebere Okoronkwo

*New Boshang Hospital Ltd*

Bitrus Fidelis\*  
Rephath Pius  
Cyril Jomосу

*University of Nigeria Teaching Hospital, Enugu*

Enoch Uche\*  
Chukwuemeka Osuagwu  
Chukwudi Ilo  
Mesi Matthew  
Uko Uko  
Ngozi Mba

*Olabisi Onabanjo University Teaching Hospital*

Olusoji Jagun\*  
Oluwabunmi Fatungase\*  
Adeniyi Akiseku  
Chigbundu Nwokoro  
Ramotalai Shoyemi  
Ibukunolu Ogundele

*University of Calabar Cross River State*

Queeneth Kalu\*  
Felix Effiom

*Nigerian Navy Reference Hospital Ojo, Lagos*

Adebayo Adedayo\*  
Abubakar Aliyu  
Adaora Agholor

*Nnamdi Azikiwe University Teaching Hospital*

Okechukwu Ekwunife\*  
Victor Modekwe  
Chuka Ugunne  
Chukwuemeka Okoro  
Chisom Uche

*Federal Medical Centre, Abeokuta*

Adenike Odewabi\*  
John Bamigboye  
Oladapo Kuforiji  
Chidiebere Ogo  
Stella Ogunmuyiwa  
Abdussemee Abdurrazzaaq

*Federal Medical Centre, Owerri*

Christopher Ekwunife\*  
Chimaobi Nnaji  
Chigozirim Onyekpere  
Amara Arunsi

Jude Egwim  
Obianuju Nwana

*Federal Medical Centre, Ebute Metta, Lagos*  
Adebayo Tanimola\*  
Michael Adeyanju  
Oluwatimilehin Andero  
Temitope Ojo  
Olusi Adedotun  
Gbadamosi Kehinde

*Usmanu Danfodiyo University Teaching Hospital*  
Aliyu Abdulrahman\*  
A.A. Abdullahi  
Ibrahim Galadima Bello  
Usman Adinoyin Mohammed

**Sierra Leone. National Leader: Isaac Smalle**

*Bo Government Hospital*  
Abu Rogers\*  
Peter Samai  
Sao Amara  
Margaret Yankuba  
Mary Josayah  
Jayah Swarray Jnr

*Connaught Hospital*  
Alusine Dawo\*  
Peter George\* †  
Isaac Smalle  
Mustapha Kabba  
Mohamed Bah  
Charles Mondeh

*Kenema Government Hospital*  
Ibrahim Kapuwa\*

*Makeni Government Hospital*  
Philip Mattia  
Brima Sesay  
Mohamed Sheku\*

**South Africa. National Leader: Hyla Kluyts**

*Provincial leaders:*  
Gauteng South: Jones O.A. Omshoro-Jones  
Gauteng North: Motselisi Mbeki  
Western Cape: Estie Cloete  
Northern Cape: Philip Anderson.  
KwaZulu Natal: Alexandra Torborg  
Eastern Cape: Busi Mrara  
Northwest: Annemarie Steyn.  
Limpopo: Tsakani Mhlari.  
Mpumalanga: Nic Proctor, Caroline Robertson  
Free State: Gillian Lamacraft.

*Addington Hospital*  
Sebenzile Sikhakhane  
Usha Singh\*

*Bethesda Hospital*  
Kelly Gate\*

*Charles Johnson Memorial Hospital*  
Shepherd Nzenza\*

*Estcourt Provincial Hospital*  
Patrick Lufuta Kande\*

*Eshowe District Hospital*  
John Tshimbalanga Kasonga\*  
Sibongile Ndebele

*George Regional Hospital*  
Tino-vito Orlandi  
Marischka de Jong  
Hugo Stark  
Francois Roodt  
Jody Davids\*  
Jonathan Hall  
Ian Nortje  
Akanimo Akpakan

*Khayelitsha District Hospital*  
Muneeerah Cassiem  
Sarwat Ikram-Hameed\*  
Adriaan Smit

*King Dinuzulu Hospital*  
Yvonne Freeman\*  
Saaliha Goga\*

*King Edward VIII Hospital*  
Larissa Cronje\*  
Suman Mewa Kinoo  
Vivesh Rughubar  
Rishan Bipath  
Constantin Buzdugan  
Subash Chirkut  
Priyadeshni Singh  
John Arnold  
Ncumisa Msolo  
Sandhaya Jithoo

*Mahatma Gandhi Memorial Hospital*  
Tshegofatso Mmasello Emma Boka  
Martyn Biccard Greenwood  
Shakthi Anand Jayrajh  
Devarani Naidoo  
Syndrini Reddy\*  
Devandiran Harriraman Rungan\*  
Kylene Subrayen

*Manguzi Hospital*  
Fleur Ackermans-Deijnen\*

*Mitchell's Plain District Hospital*  
John Roos\*  
Nina Tredoux

*Mosvold Hospital*  
Pascal Simon Plumacher\*

*New Somerset Hospital*  
Estie Cloete  
Paul Ryan Herselman  
Mariesa Nock  
Anthony Reed\*  
Harald Steinhaus  
Nicola Vickery

*Paarl Hospital*  
Gareth Davies\*  
Talitha Harvey  
Franklin Muller  
Willem Naude  
Tania Pretorius  
Johan Jochemus Swart  
Merryn Walls

*Prince Mshiyeni Memorial Hospital*

Prashant Gokal\*

*RK Khan Hospital*

Farzana Dhoodhat

Precious Dzanibe

Mohammed Hussain

Asmitha Junpath

Ameela Maharaj

Hylda Makanisi

Khalid Moosa

Nicolette Rorke\*

Ting Ting Wong

Sean Mould

*St Aidan's Hospital*

Trisha Ramsamy\*

*Stanger Hospital*

Vasheel Bahadur

Roel Matos-Puig\*

Hayley Morgan

Nadeem Nabeebuccas

Ria Devi Naidoo

Viantha Pather

*Victoria Hospital*

Nicole Bell

Zahanne Fullerton\*

Bongisa Grey

Vincent Lorenzo Visentin

*Worcester Regional Hospital*

Terri Anne Killingbeck

Emile Maneveldt

Oostewalt Swart

Gerhard Thiart

Hendrick Adriaan van Zyl\*

Magdalena May Venter

*Grey's Hospital*

Ronisha Sathiram

Mohammad Kathrada

Vishendran Govindasamy\*

Zane Farina

Lucio Frittella

Charles Kohler

Sibuyiselwe Lubelwana

*Tygerberg Hospital*

Renilda Pillay\*

*Edendale Hospital*

Mariette Grobelaar\*

Carel Cairns\*

David Bishop

Christien Steenkamp

Thandekile Khumalo

*Port Shepstone Hospital*

Noel Naidoo\*

*Citrusdal Hospital*

Ross Murray\*

*Madadeni Hospital*

Martin Kopieniak

Mxolisi Brian Ndimande

Melusi Sishange

*Karl Bremer Hospital*  
Megan Jaworksa\*

*Helderberg Hospital*  
Megan Jaworksa\*

*Eerste River Hospital*  
Sarwat Ikram\*  
Bence Rainier

*Beaufort West Hospital*  
Renier J Liebenberg\*  
Helena D Zwiegers  
Philip M Nortje

*Groote Schuur Hospital*  
Kamal Bhagwan\*  
Estie Cloete  
Margot Flint  
Robert Dyer  
Simone Adams

*Queen Nandi Regional Hospital*  
Yoshua Bwambale\*  
Danny Ngomo  
Patrice Kanku

*Inkosi Albert Luthuli Central Hospital*  
Nivashen Pillay\*  
Alexa de Castro  
Atisha Maharaj  
Janine Carim  
Jenna Leigh Taylor  
Karl M Köhne  
Leanne W Drummond  
Leanne Temlett  
Lieve Geldenhuys  
Lucy Rolt  
Yvonne Seilbea  
Kathryn Naidoo  
Nicola A Kalafatis  
Stefné Verwey  
Thulile Biyase  
Theroshnie Kisten  
Belinda S Kusel  
Timothy Craig Hardcastle  
Richard Magagula  
Christian Kampik  
Kuzolunga Xulu  
Sivuyisiwe Solala  
Mia Sayed  
Basil Enicker  
Anil Madaree  
Innocent Mukama  
Alexandra Torborg

*Ladysmith Regional Hospital*  
Gladmore Madombwe\*  
Nonhlanhla Zulu\*  
Nompumelelo Gasa  
Nokuzula Kanjana  
Sebenzile Buthelezi  
Thembelihle Buthelezi

*Knysna Provincial Hospital*  
Andries Brink\*  
Francois Potgieter

*Nelson Mandela Academic Hospital*

Busisiwe Mrara\*  
Freddy Kabambi  
Zaynab Alexander  
Charles Choto  
Paula Ima  
Zintle Gxagxisa  
Baphethuxolo Ningiza

*Universitas Academic Hospital*

Gillian Lamacraft\*  
Jerome Mogorosi  
Nadia du Plessis  
Leonie de Man  
Suné Thompson  
Gerrit van Heerden

*Pelonomi Hospital*

Edwin W Turton\*  
Pieter M van der Linde\*  
Josephine K Teme-Pitse  
Reitumetse Tladi  
Gillian D Saffy  
Ene-Mari Roscher  
Kristel Fortune  
George Barnard  
Tiisetso Makhasane  
Evan Bowen  
Akangcha Pal

*Chris Hani Baragwanath Academic Hospital*

Rachel Moore  
Maria Fourtounas  
Mary Augusta Adam  
Renessa Arumugan  
Gabriella Hyman  
Jaclyn Jonosky  
Maninginingi Makondo  
Heveshan Moodley  
Phillip Munda  
Mzwandile Nyalungu  
Victor Olusola  
Sohan Zane Pinto  
Tristan Pillay  
Lucinda Singh  
Paul Mwindekuma Wondoh  
John Devar

*Dr George Mukhari Academic Hospital*

Boitumelo Baloyi-Mnisi\*  
Zach Koto\*  
Tebogo Mabotja  
Matlou Ernest Mabitsela  
Sibongile Ruth Ndlovu  
Branny Mthelebofu

*Cecilia Maxiwane Hospital*

Colin Beck\*  
Matthew Dold  
Alice Fan  
Shannon MacQueen  
Themani Matabata  
Catherine Mpehle  
Charné Kulenkampf

*Pieterburg / Polokwane Hospital*

Tsakani McCreath Mhlari\*  
Simangele Cecilia Nyoka- Mokgalong  
Felix Thumba Masinge  
Randhir Ramnath Gunpath

Maropeng Petrus Pat Mothwa  
Jo-Anne Asenath Mothwa

*Baberton District Hospital*  
Danai Mhlanga\*  
Jamie-Lyn Colly

*Klerksdorp Hospital*  
Aunel Mallier Peter\*  
Khalid Ben Hamed

*Job Shimankane Tabane Provincial Hospital*  
Pulane Mokae  
Stella Josephine Moumakoe  
Kelechi Ekeh

*Kuruman Hospital*  
Nezingu Lengo\*

*Kimberley Hospital Complex*  
Marnus Booyens\*  
Inge Louise Seale  
Pieter Daniel Theron  
Nicolaas Abraham Schuman  
Amber Carlyn Sonn  
Jacobus Lukas Stander  
Nadia Cloete  
Marius Cloete  
Catherine Ann Makepeace  
Ronel van der Westhuizen  
Leanne Robyn Messiahs  
Amy Ruth Visagie  
Fatima Vawda  
Frans Christiaan Voster  
Deepika Dhilraj

*Charlotte Maxeke Johannesburg Academic Hospital*  
Oliver Smith\*

*Kalafong Academic Hospital*  
Daniel Montwedi\*  
Motsilisi Mbeki

*Steve Biko Academic Hospital*  
Jayde Wyngaard\*  
Mthunzi Ngcelwane

*Rahima Moosa Mother & Child Hospital*  
Thomas Kleyenstuber\*  
Phyllis Phukubye  
Liesel Schärf

*Tambo Memorial Hospital*  
Grace Laker\*

*Helen Joseph Hospital*  
Elizabeth Semanya\*  
Reinhard Dembskey  
Thomas Tarlton  
Tapiwa Jiri

*Frontier Hospital*  
Ngoie Hubert Mushid\*

*Thelle-Mogoerane Hospital*  
Nhlanhla Samuel Ngwenya\*  
Hazel Morongoa Mogodi  
Carmen Sinevici

*Mthatha Regional Hospital*

Anthony Osarogie Usenbo\*  
Naledi Fodo  
Anesu Chimini  
Ntetelelo Sikobi  
Sinovuyo Nokwange  
Mluleki Noqhamza  
Qumba Thembisa

*Frere Hospital*  
Kajake Anantha Padmanabha Bhat\*  
Robin Mathew  
Katrin Middleton

*Sebokeng Hospital*  
Abdus-sami Adewunmi\*  
Craig Dickson  
Humairah Bulbulia

*Potchefstroom Hospital*  
Bianka Bester  
Michelle de Klerk

*Rob Ferreira Hospital*  
Christia Benade  
Francois Viljoen  
Caroline Robertson\*  
Monique Fischer

**Sudan. National Leader: Tarig Fadalla**

*Al Akadimiy Charity Hospital*  
Khalid Alfaki\*

Saad Abul-Ella Teaching Hospital  
Mohammed Osman\*  
Mazin Mohamed  
Mohamed Elhasan  
Abrar Widatalla

*Ribat Teaching Hospital*  
Tarig Fadalla  
Mazin Suliman\*  
Hanaa Mohammed  
Lina Aljeally  
Mohammed Dirar

*Wad Medani Teaching Hospital*  
Abubakr Abubakr\*  
Eman Mohamed  
Alshareef Nour

*Port Sudan Maternity Hospital*  
Asia Elgailany\*

*El Fashir Teaching Hospital*  
Abdalmalik Awad\*  
Abdelsalam Algray  
Mohammed Elsiddig  
Suha Mohamed  
Salih Mahmoud  
Muhammed Osman

**eSwatini. National Leader: Cynthia Lule**

*Hlathikhulu Government Hospital*  
Ntonto Doris Gama\*

*Mbabane Government Hospital*  
Dolorosa Khetsiwe Shabangu\*  
Cynthia Iradikunda



*Releigh Fitkin Memorial Hospital*  
Samuel Mkoko\*

**Tanzania. National Leader: Bernard Mbwele, Mpoki Ulisubisya, Lazaro Mboma**

*Sumbawanga Regional Referral Hospital*

Elias Chrisant\*  
Gilbert Msoma  
Titus Kihwili  
Gadiel Temu

*Bukoba Regional Referral Hospital*

Museleta Nyakiroto\*  
Emmanuel Jitambi  
Venant Geoffrey  
Johaphes Josiah

*Uwata Hospital-Mbeya*

Edwin Edward\*  
Paul Kilamile\*  
Stephen Mwakyolile

*Mazwi Health Centre*

Jenitha Cheru\*  
Margaret Henjewe  
Greyson Kilimanjaro  
Sarah Sikimata

*Bugando Medical Centre*

Abel Makubi\*  
Vihar Kotecha\*  
Felician Kachinde

*Sengerema Council Designated Hospital*

Frederika Jager\*  
Charles Majani\*

*Rabininsia Memorial Hospital*

Elijah Ussiri\*  
Gloria Kinasa  
Patrick Adel  
Eric Malaba  
Vensesla Sakwari  
Sadot Lugereka  
Mohamed Mungia  
George Mocha  
Herman Wella  
Cecilia Protas  
Patrick Karua  
Ahmada Kashagama  
Faraja Mwasambu  
Suzana Kajeri  
Jacquiline Mchilla

*Muhimbili National Hospital - Mloganzila*

Julieth Magandi\*  
Deogratius Manyama  
Redempta Matindi  
Adam Moshi  
Daudi Kitwana  
Merida Makia  
Philip Muhochi  
Miriam Herman  
Clauda Miombo

*Mbeya Zonal Referral Hospital*

Bernard Mbwele  
Mpoki Ulisubisya  
Lazaro Mboma\*

Deocles Donatus  
Hazina Maduhu  
Tumaini Mariro  
Given Massasi  
Moshi Moshi Shabani  
Braison Cholela  
Marco Mgeleka  
Yohatinus Mbilinyi

*Dodoma Regional Referral Hospital*

Ernest Ibenzi\*  
Peter Mbelle\*  
Kato Peleus  
Enid Chiwanga  
Nillah Richard  
Shoo Leonard  
Paulo Sanka  
Subira Mushi

*Nyakahanga Hospital*

Furaha Kahindo\*  
Langtone Kishebuka

*Muhimbili National Hospital*

Faraja Chiwanga\*  
Bilton Exavery  
Caspar Haule  
Samson Ndile  
Sirili Harya

*Shree Hindu Mandal Hospital*

Ludovick Rukeha\*  
Tareeq Mohamed  
Nabila Fuad  
Winifrida Halinga

*Bukumbi Mission Hospital*

Phinius Makubi\*  
Frank Manumbu\*  
Suzan Mlingwa

*Selian Lutheran Hospital*

Elibariki Lucumay\*  
Robert Maise  
Amon Marti  
Beatrice Mahundi

*Arusha Lutheran Medical Centre*

Paul Kisanga\*  
Emmanuel Lema\*  
Benson Lyimo

*Temeke Regional Referral Hospital*

Hussein Msuma\*  
Eva Shang'a  
Stella Ibrahim

*Jakaya Kikwete Cardiac Institute*

Bashir Nyangasa\*  
Mohamed Janabi  
Naizihijwa Majani  
Pedro Palangyo  
Evarist Nyawawa  
William Ramadhan  
Faraj Lydenge

*Benjamin Mkapa Hospital*

Mohamed Binde\*  
Alphonse Chandika\*  
Salim Salim

Sylvia Jumbe

*Tanga Regional Hospital / Bombo Regional Referral Hospital*

Naima Yusuf\*  
Rashid Saleh  
Rashid Inoja

*Kilimanjaro Christian Medical Centre*

Ansbert Ndebea\*  
Gileard Gabriel Masenga  
Sakina Rashid  
Mubashir Jusabani

**Togo. National Leader: Hamza D Sama**

*CHU Kara*

Talkana Adja\*  
Edem Gueouguede

*Centre Hospitalier Universitaire Sylvanus Olympio de Lomé*

Hafoudhoi Oussene Seddoh  
Saliou Adam  
Pilakimwe Egbohoh  
Mawunyo Ahomagnon  
Olivier Kadjossou  
Abdul-Bassiti Boukari

**Uganda. National Leader: Adam Hewitt-Smith, Janat Tumukunde**

*International Hospital Kampala*

Peter Kaahwa Agaba\*  
Daphne Kabatoro  
Joseph Kayongo  
Margaret Naggujja  
Nabasiige Rehema

*Uganda Heart Institute*

Rita Nkwine\*

*Mengo Hospital*

Gorret Nampiina\*

*Jinja Regional Referral Hospital*

Daniel Kavuma  
Aggrey Lubikire  
Phiona Nansubuga\*  
Hope Bisilikirwa  
Godfrey Ssebagala

*Masaka Regional Referral Hospital*

Emmanuel Muwema\*  
Humble Joan Agaba  
John Kiconco  
Nicholas Wataaka  
Bonet Chan  
Mary Juliet Nampawu

*St. Mary's Hospital Lacor*

Peter Kayima\*  
Jacob Eyul  
Erick Odwar

*Mbale Regional Referral Hospital*

Fred Bulamba\*  
Emmanuel Bua  
Christine Mugala  
Caroline Nyakato  
John Paul Ochieng  
Linda Kyomuhendo Jovia

*Uganda Martyrs' Hospital Lubaga*  
Elizabeth Nabakka  
Christine Namata\*  
Denis Kakaire

*Mbarara Regional Referral Hospital*  
Rachel Alum  
George Kateregga\*  
Lazia Najjuma

*Nakasero Hospital Limited*  
Andrew Kintu\*  
Joshua Sempira  
Luzige Simon

*China-Uganda Friendship Hospital*  
Ruth Muhindo  
Mary T Nabukenya\*  
Peter Waswa

**Zimbabwe. National Leader: Pisirai Ndarukwa**

*Gwanda Provincial Hospital*  
Elton Ndhlovu\*  
Zanele Mangwangwa  
Nombulelo Dube

*Parirenyatwa Hospital*  
Dennis Mazingi\*  
Chenesa Mbanje  
Busisiwe Mlambo

*Mpilo Central Hospital*  
Crispin Ntoto\*  
Derek Matsika

*Marondera Provincial Hospital*  
Celestino Dhege\*  
Juliet Hungwa  
Hemish Jasi

*Mutare Provincial Hospital*  
Brightson Mutseyekwa\*  
Joseph Zimbovoora  
Beulah Gudyanga

*Gweru Provincial Hospital*  
Velda Mushangwe-Mtisi\*  
Erisha Munhamo

*Chitungwiza Central Hospital*  
Pisirai Ndarukwa\*  
Michael Chiwanga

*Harare Central Hospital*  
Harunavamwe N Chifamba\*

*PSMI Westend Hospital*  
Sarudzai Zhou\*  
Esta Hove\*  
Shamiso Dende  
Beauty Manjengwa  
Penias Kapisa

*The Avenues Clinic*  
Caritas Chiura  
Locadia Katsukunya\*  
Godfrey Muguti  
Doreen Mashava



## Supplementary Material S1. ASOS-3 Protocol amendments

### Protocol v2

Protocol v2 was the first approved ASOS-2 protocol by the UCT Human Research Ethics Committee (HREC)

### v2 to v3 amendment

1. Page 2. Steering Committee: This has been changed to include essential local and international collaborators who have helped further refine the sample size and statistical analysis, and the trial processes.
2. Page 2. Funders of ASOS-2 have now been added to the protocol.
3. Page 6, 10, 14. Sample size amendment. Based on the coefficient of covariance of ASOS-1 we have increased the sample size to a more conservative number. This has required an increase in the recruitment period of potentially up to four weeks (in low recruiting sites). We have increased the recruitment period to four weeks at low surgical volume sites, as this decreases the coefficient of variance, which limits the sample size.
4. Page 18. Monitoring and auditing. Based on the increase in the sample size, and the potential increase in the duration of recruitment for some sites, we have added an independent international advisor (a world leading perioperative clinical trialist) who will advise on whether; i) hospital recruitment can continue after the planned recruitment window, and ii) whether an interim analysis would be required prior to continuing recruitment, if recruitment is slower than expected.
5. Page 11. Intervention arm. Based on the findings of the ASOS-2 Pilot Trial, we have made the following amendments; i) changed the definition of proximity to the nurses station, as a bed assigned to within view of the nurses' station, and ii) have added the 'Postoperative surveillance bedside guide' for all high-risk patients.
5. Page 18. Training of investigators. We have added 'remote electronic site initiation', as we believe it will be impossible for the national leaders to visit every site prior to the trial.
6. Page 6 and 20. We have increased the potential recruitment window to 4 months, as we believe that the sites will not all be ready to recruit within the same starting month.
7. The amended CRF's are attached. They also include capturing 'source data' of in-hospital mortality, which is the primary outcome.
8. There are minor grammatical changes in the protocol, to clarify (or correct the text) where questions have arisen from National Leaders, and other ASOS-2 investigators.

### v3 to v4 amendment

#### **Revision 1. Page 11. Section 6.3**

i. Old wording:

Participating sites will be randomised to normal postoperative care or increased postoperative surveillance. Randomisation will be stratified according to the level of the surgical facility and the expected weekly surgical case-load.

ii. New wording:

Participating sites will be randomised to normal postoperative care ("SOC"), or increased postoperative surveillance ("Intervention") in four recruitment blocks (calendar time blocks). Randomisation in each block will be stratified by country and by level of the surgical facility with a fixed block size of 2. The randomisation algorithm will seek to balance randomisation arms by simulating randomisations with an automated filter to screen out poorly balanced randomisations. In the second and subsequent recruitment blocks, the randomisation algorithm will use knowledge of the previous randomisations and a similar simulation and filtering approach to ensure reasonable balance across arms and across level of surgical facility. This approach was developed on the basis of a simulation model for the randomisation that was used to evaluate the probability of overall balance of randomisation arms and balance within level of care strata if randomising recruitment phases in waves. Results of 10,000 simulation runs indicated that a balanced simulation within the bounds described below would be obtained >50% of the time without the filtering step.

The algorithm is described briefly here:

For recruitment phase 1:

Simulate stratified block randomisation within country and level of facility

Check that simulated randomisation has percent SOC between [48% - 52%]

If NO, then repeat steps 1 and 2. If YES then use this randomisation.

For all other recruitment phases:

Simulate stratified block randomisation for this phase within country and level of facility

Combine this simulation with prior actual randomisations

Check that combined randomisation has percent SOC between [48% - 52%]

If NO, then repeat steps 1-3. If YES proceed to next check.

Check that combined randomisation has balance within level of care between [45% - 55%]

If NO, then repeat steps 1-5. If YES then use this randomisation.

iii. Detailed rationale/ justification/ explanation:

The randomisation procedure was incompletely described in the previous protocol. The updated description of the randomisation procedure was tested through simulation and describes the procedure more comprehensively.

**Revision 2. Pages 15-17. Section 7.5**

i. Old wording:

Not applicable

ii. New wording:

7.5. Process evaluation

During the conduct of the ASOS-2 Trial we will perform a concurrent 'process evaluation' to gain insight into the implementation process. The process evaluation aims to:

1. Measure protocol compliance (fidelity of implementation),
2. Identify factors that influence success of implementation,
3. Verify specified process steps that form part of the implementation of the protocol and logical framework of the trial, and
4. Generate contextual information about the trial setting.

The questions asked by the process evaluation are:

1. Which factors determined fidelity of implementation at the local hospital level?
2. How did implementation of the intervention affect patient care?
3. Why does the intervention produce (or fail to produce) a change in patient morbidity and mortality?

The measurement tools used for the process evaluation are:

1. The post-education, REDCap online test,
2. The individual participant case record form (CRF),
3. An online database, called the screening log, which is a REDCap application for participating hospitals to record the number of eligible patients daily,
4. Research fellows will perform selected site visits in order to verify specified process steps and perform structured interviews with a sample of stakeholders,
5. Telephonic structured interviews with a sample of stakeholders that cannot be reached by the two research fellows, and
6. A post-trial, semi-quantitative, REDCap based, online questionnaire built around the key components identified in the structured interviews and the pilot trial.

Each member of the local hospital investigator team will be asked to complete the post-education online test prior to patient recruitment. The online test comprises eight short multiple-choice questions which test the comprehension of the key points from the education material.

The individual participant CRF (Appendix 3) captures information that allows checking accuracy of risk stratification, fidelity of implementation, and differences in patient experience between non-high risk patients in the two arms.

The research fellows will visit specific sites during the trial on appointed days agreed upon by the local hospital investigators. They will visit sites during the initiation phase, the recruitment phase, and the follow-up phase of the trial. They will use standard site visit checklists to identify non-compliance, barriers and facilitators of implementation. During the follow-up phase they will interview a sample of stakeholders who indicate willingness to participate in a qualitative interview about their personal experience of the trial. Verbal consent will be obtained and recorded for each interviewee who agrees to participate. No personal identifying information will be recorded for interviewees. Interviews will be recorded. A semi-structured script will be used for the interviews. Recordings will be stored on a password protected cloud based drive. Interviews will be analysed deductively by independent investigators using the Consolidated Framework for Implementation Research (CFIR) as a guide. The recordings will be destroyed following analysis.

The post-trial questionnaire will be anonymous. At the start of the questionnaire respondents will be informed about its content and intent. Respondents will be given the opportunity to opt out, or to give consent prior to continuing to the questions. Questions will test the CFIR constructs that were highlighted in the structured stakeholder interviews.

ii. Detailed rationale/ justification/ explanation:

The previous protocol did not describe any process evaluation. Various experienced international trialists urged the steering committee to describe a formal process evaluation as part of the trial. The process evaluation is essential for translation of the findings of the trial to subsequent clinical practice. I will allow improved understanding of the trial context which influences implementation and effectiveness of the intervention.

**Revision 3. Page 19. Section 10**

i. Old wording:

Not applicable

ii. New wording:

He [referring to the independent international advisor] will also check the event rate in the control arm of the study when at least 80% of all recruited patients have been captured on REDCap. If the event rate of the control arm is lower than predicted, the independent international advisor will use the event rate in the control arm to decide whether recruitment of further hospitals is required beyond the original sample size of 664 hospitals, in order to maintain 80% power for the primary outcome. This specified interim analysis of data will not lead to adjustment of the prespecified alpha of 0.05.

iii. Detailed rationale/ justification/ explanation:

Event rate driven recruitment is an established method to ensure that a trial does not conclude with a sample that is underpowered for the outcome(s) of interest. Such an outcome would waste the considerable time, effort and resources that have been invested by thousands of researchers across Africa. Testing the event rate does not test any of the outcomes of the trial and does therefore not incur any penalty for repeated testing.

**Revision 4. Pages 37-38. Appendix C (case record forms)**

i. Old wording:

Status at hospital discharge or 30<sup>th</sup> postoperative in-hospital day:

Alive & still in hospital                       Dead                       Alive & discharged

ii. New wording:

Status at hospital discharge or 30<sup>th</sup> postoperative in-hospital day:

Alive & still in hospital                       Dead  
 Alive & discharged → if alive and discharged, was patient transferred to another facility for higher care?  Yes  No

iii. Detailed rationale/ justification/ explanation:

The same amendment is made to both the control and intervention case report forms. This amendment to the case report forms allows us to distinguish between patients who have been discharged home or to a convalescent facility (i.e. experienced a favourable outcome) compared to patients who were transferred to another hospital for higher level of care (i.e. lost to follow-up).

**v4 to v5 amendment**

**Revision 1. Page 2.**

iv. Old wording:

None

v. New wording:

6. Patrice Forget MD, PhD, Professor, Clinical Chair in Anaesthesia, Institute of Applied Health Sciences, School of Medicine, Medical Sciences and Nutrition, University of Aberdeen, United Kingdom. Honorary Consultant, NHS Grampian, Aberdeen, United Kingdom

7. Tim Stephens BA (Hons), MSc Global Health and Development, Critical Care and Peri-operative Medicine Research Group WHRI, Queen Mary University of London, E1 1BB, United Kingdom



vi. Detailed rationale/ justification/ explanation:

Two steering committee members added. Patrice Forget is a crucial member of the trial team and will be the only Francophone steering committee member. Tim Stephens is a crucial member of the process evaluation team bringing expertise in this area to the steering committee.

**Revision 2. Pages 15. Section 7.1**

iii. Old wording:

The inter-cluster correlation coefficient (ICC) in ASOS was 0.01.

iv. New wording:

The intra-cluster correlation coefficient (ICC) in ASOS was 0.01.

v. Detailed rationale/ justification/ explanation:

The correct term is intra-cluster correlation coefficient. This was a spelling mistake.

**Revision 3. Pages 15. Section 7.1**

i. Old wording:

Based on a relative risk reduction of 25% in the intervention arm, the power for the secondary outcome, based on the sample sizes for the primary outcome are shown in Table 1.

ii. New wording:

Based on a relative risk reduction of 25% in the intervention arm, the sample sizes for the primary outcome are shown in Table 1.

iii. Detailed rationale/ justification/ explanation:

The sample size refers to the primary outcome, not the secondary outcome.

**v5 to v6 amendment**

**Revision 1. Page 7. Section 2.**

vii. Old wording:

To determine whether increased postoperative surveillance reduces in-hospital mortality in high-risk adult surgical patients aged 18 years and over in Africa.

viii. New wording:

To determine whether increased postoperative surveillance in high-risk adult surgical patients reduces overall in-hospital mortality in surgical patients aged 18 years and over in Africa.

ix. Detailed rationale/ justification/ explanation:

The sentence structure of the outcome definition was corrected as it became apparent that the former version suggests we are only interested in the outcome of high-risk patients, whereas, we are principally interested in the outcome of all patients in the trial.

**Revision 2. Page 7. Section 2.**

vi. Old wording:

Recruitment end date August 2019

vii. New wording:

Recruitment end date March 2020

viii. Detailed rationale/ justification/ explanation:

At the end of August we had not reached our recruitment target. The progress of the trial was evaluated by our external auditor, Professor Paul Myles, Monash University, who advised that the trial continue. We plan to provide a next progress report to Professor Paul Myles during January 2020.

**Revision 3. Page 9. Section 4.**

iv. Old wording:

To determine whether increased postoperative surveillance reduces in-hospital mortality in high-risk adult surgical patients aged 18 years and over in Africa.

v. New wording:

To determine whether increased postoperative surveillance in high-risk adult surgical patients reduces overall in-hospital mortality in adult surgical patients aged 18 years and over in Africa.

vi. Detailed rationale/ justification/ explanation:  
Duplication of revision 1.

**Revision 4. Page 9. Section 4.**

i. Old wording:

To determine whether increased postoperative surveillance reduces the incidence of the composite of severe in-hospital complications and mortality in high-risk adult surgical patients aged 18 years and over in Africa.

ii. New wording:

To determine whether increased postoperative surveillance in high-risk adult surgical patients reduces the overall incidence of the composite of severe in-hospital complications and mortality in adult surgical patients aged 18 years and over in Africa.

iii. Detailed rationale/ justification/ explanation:

Duplication of revision 1.

**Revision 5. Pages 10. Section 5.**

i. Old wording:

Recruitment will run in 2019.

ii. New wording:

Recruitment will run until March 2020.

iii. Detailed rationale/ justification/ explanation:

Duplication of revision 2.

**Revision 6. Page 10. Section 5.**

i. Old wording:

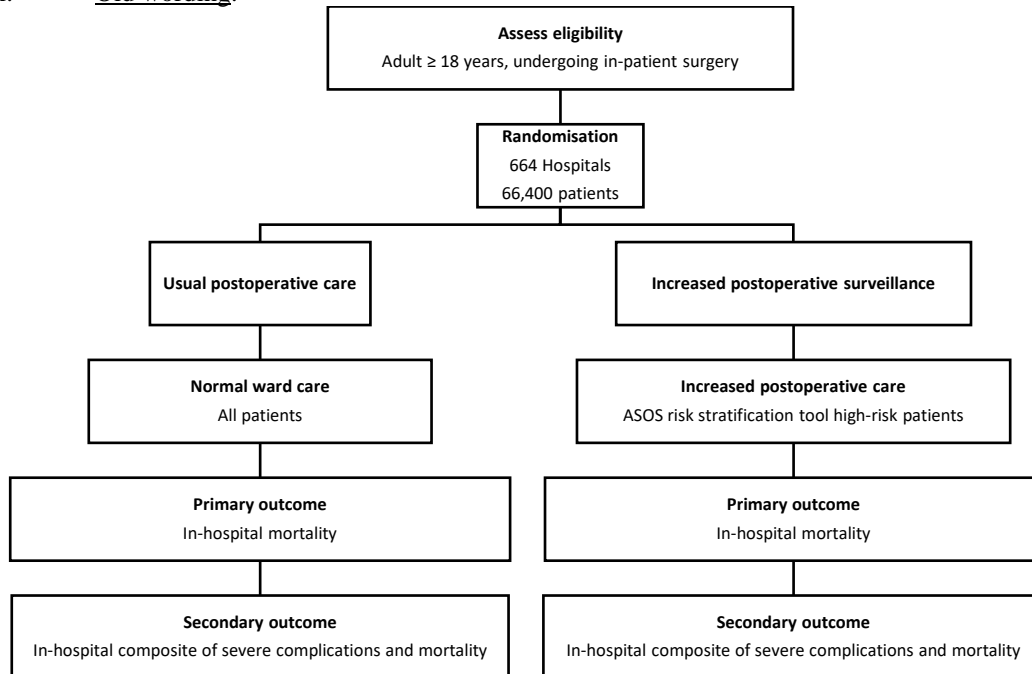

ii. New wording:

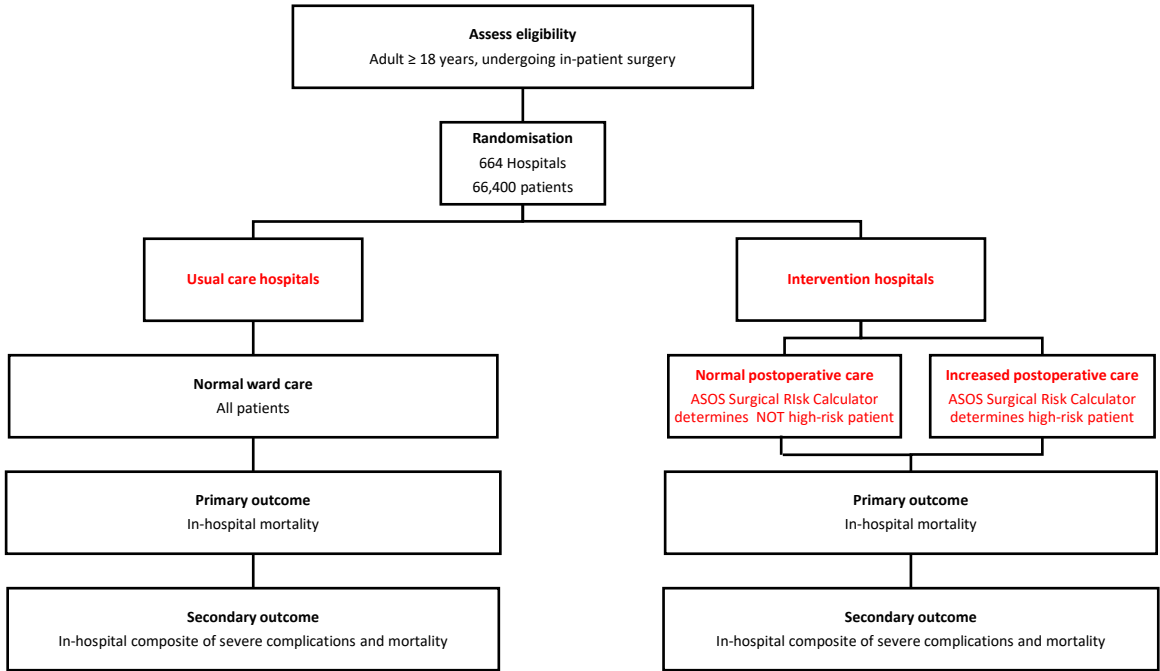

iii. Detailed rationale/ justification/ explanation:

The flow diagram was updated to make it clear that the hospital is the unit of randomisation in this trial and that within intervention hospitals it is only the subset of high-risk patients who should receive increased postoperative surveillance.

**v6 to v7 amendment**

The statistical analysis plan was added to version 6.

## Supplementary Material S2. Broadcasting document

### This hospital is participating in a surgical trial

This hospital is participating in a surgical trial, known as the African Surgical OutcomeS-2 (ASOS-2) Trial. The ASOS-2 Trial will determine whether increased postoperative surveillance reduces in-hospital death in high-risk adult surgical patients across Africa. Hospitals are randomised to provide usual care, or increased surveillance of high-risk patients. All adult patients aged 18 years and over who have surgery in this hospital are included in this trial. All patients in this hospital will receive similar postoperative surgical management, based on which arm of the trial that this hospital has been randomised to.

**Potential harm to participants:** We do not believe that this trial provides any potential harms to participants. You may not benefit directly from participation in this trial, however the results of this trial may help us to provide better care to future surgical patients in Africa.

**Confidentiality:** The study doctor and his/her study team will look at your personal health information and collect only the information they need for the study. This information includes:

- Your name, gender and date of birth
- Information about your surgery, and test results before your surgery and while you are in hospital after the surgery
- Information about your health status and health outcomes

The information that is collected for the study will be kept in a locked and secure area by the study doctor. Only the study team or the people or groups listed below will be allowed to look at your records. Your participation in this study also may be recorded in your medical record at this hospital. The following people may come to the hospital to look at the study records and at your personal health information to check that the information collected for the study is correct and to make sure the study followed proper laws and guidelines:

- The study lead investigator(s) or his/her representatives
- Representatives of the University of Cape Town Research Ethics Board

Some of your health information will be sent outside of the hospital to the trial lead investigators and stored at a secure research database hosted by Safe Surgery South Africa, of the South African Society of Anaesthesiologists. Any information about you that is sent out of the hospital will have a code and will not show your name or address, or any information that directly identifies you. All information collected during this study, including your personal health information, will be kept confidential and will not be shared with anyone outside the study unless required by law. You will not be named in any reports, publications, or presentations that may come from this study.

**Treatment Options:** If you choose not to be in this study you will still get the best available treatment and be managed according to standard international guidelines. If you decide to leave the study, the information about you that was collected before you left the study will still be used. No new information will be collected without your permission.

**Publication of Results:** The results of this study may be presented at conferences or seminars and may be published in a medical journal. All information during presentations will be anonymous. Study results will be available from the study investigators once the study is complete and the data is analysed.

**Potential Costs of Participation and Reimbursement to the Participant:** There is no cost to participate in this study. You will not be reimbursed for your participation.

**Compensation for Injury:** If you suffer a physical injury from participation in this study, medical care will be provided to you in the same manner as you would ordinarily obtain any other medical treatment. Participation in this trial does not waive your legal rights nor release the study doctors, the hospital from their legal and professional responsibilities. Reasonable medical expenses incurred through research-related injuries will be covered by the University of Cape Town's no-fault insurance cover.

**Participation and Withdrawal:** Participation in any research study is voluntary. If you choose not to participate, you and your family will continue to have access to surgical care at this hospital. If you decide to participate in this study, you can change your mind without giving a reason, and you may withdraw from the study at any time without any effect on the care you and your family will receive any Hospital.

**New Information:** If the trial investigators learn new information that affects your participation, you will be informed in a timely manner.

**Research Ethics Board Contact:** If you have any questions regarding your rights as a research participant, you may contact Administrator, Human Research Ethics Committee during business hours.

Contact: E 53 Room 46, Old Main Building, Groote Schuur Hospital, Observatory, Cape Town

Telephone: 27 21 406 6492

Email: nosi.tsama@uct.ac.za or shuretta.thomas@uct.ac.za

The study protocol and consent form have been reviewed by a committee called the Human Research Ethics Committee at University of Cape Town. The Human Research Ethics Committee is a group of scientists, medical staff, and individuals from other backgrounds (including law and ethics) as well as members from the community. The committee is established by the hospital to review studies for their scientific and ethical merit. The Board pays special attention to the potential harms and benefits involved in participation to the research participant, as well as the potential benefit to society.

This committee is also required to do periodic review of ongoing research studies. As part of this review, someone may contact you from the Human Research Ethics Committee to discuss your experience in the research study.

**Study Contacts:** If you require any further information or have any concerns, please feel free to contact the investigators or study coordinator: \_\_\_\_\_

### **Supplementary Material S3. Randomisation algorithm**

The randomisation algorithm is described briefly here:

For recruitment phase 1:

1. Simulate stratified block randomisation within country and level of facility.
2. Check that simulated randomisation has percent 'standard of care' between [48% - 52%].
3. If NO, then repeat steps 1 and 2. If YES then use this randomisation.

For all other recruitment phases:

1. Simulate stratified block randomisation for this phase within country and level of facility.
2. Combine this simulation with prior actual randomisations.
3. Check that combined randomisation has percent 'standard of care' between [48% - 52%].
4. If NO, then repeat steps 1-3. If YES proceed to next check.
5. Check that combined randomisation has balance within level of care between [45% - 55%].
6. If NO, then repeat steps 1-5. If YES then use this randomisation.

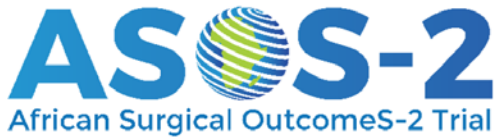

## **‘Increased postoperative surveillance’ bedside guide**

**This is a ‘high-risk’ surgical patient**

**This patient requires ‘increased postoperative surveillance’ and is most likely to experience one of these complications postoperatively**

**‘High-risk’ patients most commonly experience the following complications.**

| <b>Most common complications</b> | <b>Consider the following management</b>                                       |
|----------------------------------|--------------------------------------------------------------------------------|
| Cardiac arrest                   | Ensure staff know where the emergency drugs and defibrillator are stored       |
| Surgical site infections         | Swab wound for microbiology, and consider antibiotics                          |
| Bloodstream infections           | Consider early blood cultures, and consider antibiotics                        |
| Pneumonia                        | Physiotherapy, mobilise early, sputum & blood cultures, & consider antibiotics |
| Acute kidney injury              | Ensure adequate hydration, monitor the serum creatinine                        |
| Postoperative bleed              | Look for signs of hypotension, and decreasing haemoglobin                      |

**If for any reason you are concerned about the patient’s condition postoperatively,  
then please look for these complications**







## Supplementary Material S7. Site initiation checklists

| <b>ASOS-2 HOSPITAL LEADER CHECKLIST (CONTROL ARM)</b>                                                                                     | <input checked="" type="checkbox"/> |
|-------------------------------------------------------------------------------------------------------------------------------------------|-------------------------------------|
| Site initiation educational material attached                                                                                             | <input checked="" type="checkbox"/> |
| Upload ethics approval                                                                                                                    | <input type="checkbox"/>            |
| Upload Hospital Leader GCP certificate                                                                                                    | <input type="checkbox"/>            |
| <b>Weeks three and two before recruitment begins</b>                                                                                      | <input type="checkbox"/>            |
| Identify local ASOS-2 team of at least two people, ideally three or more                                                                  |                                     |
| Hospital Leader to educate Local ASOS-2 team with site initiation educational material                                                    | <input type="checkbox"/>            |
| Local ASOS-2 team to complete site initiation online questionnaire after completing educational material                                  | <input type="checkbox"/>            |
| Local ASOS-2 team decides who will perform each task (data collection, follow up)                                                         | <input type="checkbox"/>            |
| Local ASOS-2 team members to educate all involved departments e.g. surgery department etc., about the trial                               | <input type="checkbox"/>            |
| <b>One week before recruitment begins</b>                                                                                                 | <input type="checkbox"/>            |
| Placement of trial advisory ('broadcasting') posters in patient care areas                                                                |                                     |
| <b>Monday of start of recruitment</b>                                                                                                     | <input type="checkbox"/>            |
| Trial begins                                                                                                                              |                                     |
| Trial recruitment ends at i) the end of the week when the total recruited patients exceeds 100 patients, or ii) after 4 weeks recruitment | <input type="checkbox"/>            |
| Hospital Leader or designee uploads physical CRFs into electronic database                                                                | <input type="checkbox"/>            |

| <b>ASOS-2 HOSPITAL LEADER CHECKLIST (INTERVENTION ARM)</b>                                                                                         | <input checked="" type="checkbox"/> |
|----------------------------------------------------------------------------------------------------------------------------------------------------|-------------------------------------|
| Site initiation educational material attached                                                                                                      | <input checked="" type="checkbox"/> |
| Upload ethics approval                                                                                                                             | <input type="checkbox"/>            |
| Upload Hospital Leader GCP certificate                                                                                                             | <input type="checkbox"/>            |
| <b>Weeks three and two before recruitment begins</b> Identify local ASOS-2 team of at least two people, ideally three or more                      | <input type="checkbox"/>            |
| Hospital Leader to educate Local ASOS-2 team with site initiation educational material                                                             | <input type="checkbox"/>            |
| Local ASOS-2 team to complete site initiation online questionnaire after completing educational material                                           | <input type="checkbox"/>            |
| Local ASOS-2 team decides who will perform each task (risk calculation, interventions, follow up)                                                  | <input type="checkbox"/>            |
| Local team decides how interventions will be instituted in the hospital                                                                            | <input type="checkbox"/>            |
| Local ASOS-2 team members to educate all involved departments e.g. surgery department etc., about the trial and the intervention procedures        | <input type="checkbox"/>            |
| Local ASOS-2 team members to educate anaesthetists or designees about how to use the ASOS Surgical Risk Calculator and identify high-risk patients | <input type="checkbox"/>            |
| <b>One week before recruitment begins</b> Placement of trial advisory ('broadcasting') posters in patient care areas                               | <input type="checkbox"/>            |
| Two-day ASOS-2 Trial test run to identify barriers to providing 'increased postoperative surveillance'                                             | <input type="checkbox"/>            |
| Determine solutions to barriers identified in the test run                                                                                         | <input type="checkbox"/>            |
| <b>Monday of start of recruitment</b>                                                                                                              | <input type="checkbox"/>            |
| Trial begins                                                                                                                                       |                                     |
| Trial recruitment ends at i) the end of the week when the total recruited patients exceeds 100 patients, or ii) after 4 weeks recruitment          | <input type="checkbox"/>            |
| Hospital Leader or designee uploads physical CRFs into electronic database                                                                         | <input type="checkbox"/>            |

## Supplementary Material S8. Definitions of the components of the secondary outcome ‘severe complications’

These definitions are based on the ‘Standards for definitions and use of outcome measures for clinical effectiveness research in perioperative medicine: European Perioperative Clinical Outcome (EPCO) definitions: a statement from the ESA-ESICM joint taskforce on perioperative outcome measures’.<sup>1</sup> A severe complication is one that results in significant prolongation of hospital stay and/or permanent functional limitation or death. Almost always requires clinical treatment. The following are considered severe complications in the ASOS-2 trial:

### I. Surgical site infection (superficial)

Infection involving only superficial surgical incision which meets the following criteria:

- a. Infection occurs within 30 days after surgery and
- b. Involves only skin and subcutaneous tissues of the incision and
- c. The patient has at least one of the following:
  - i. purulent drainage from the superficial incision
  - ii. organisms isolated from an aseptically obtained culture of fluid or tissue from the superficial incision and at least one of the following signs or symptoms of infection: pain or tenderness, localized swelling, redness, or heat, or superficial incision is deliberately opened by surgeon and is culture positive or not cultured. A culture-negative finding does not meet this criterion.
  - iii. diagnosis of an incisional surgical site infection by a surgeon or attending physician

### II. Surgical site infection (deep)

An infection which involves both superficial and deep parts of surgical incision and meets the following criteria:

- a. Infection occurs within 30 days after surgery if no surgical implant is left in place or one year if an implant is in place and
- b. The infection appears to be related to the surgical procedure and involves deep soft tissues of the incision (e.g. fascial and muscle layers) and
- c. The patient has at least one of the following:
  - i. purulent drainage from the deep incision but not from the organ/space component of the surgical site
  - ii. a deep incision spontaneously dehisces or is deliberately opened by a surgeon and is culture-positive or no cultures were taken whilst the patient has at least one of the following signs or symptoms of infection: fever (>38°C) or localized pain or tenderness. A culture-negative finding does not meet this criterion.
  - iii. an abscess or other evidence of infection involving the deep incision is found on direct examination, during surgery, or by histopathologic or radiologic examination
  - iv. diagnosis of a deep incisional surgical site infection by a surgeon or attending physician

### III. Surgical site infection (organ/space)

An infection which involves any part of the body excluding the fascia or muscle layers and meets the following criteria:

- a. Infection occurs within 30 days after surgery and
- b. The infection appears to be related to the surgical procedure and involves any part of the body, excluding the skin incision, fascia, or muscle layers, that is opened or manipulated during the operative procedure and
- c. The patient has at least one of the following:
  - i. purulent drainage from a drain that is placed through a stab wound into the organ/space
  - ii. organisms isolated from an aseptically obtained culture of fluid or tissue in the organ/ space
  - iii. an abscess or other evidence of infection involving the organ/space that is found on direct examination, during reoperation, or by histopathologic or radiologic examination
  - iv. diagnosis of an organ/space surgical site infection by a surgeon or attending physician

### IV. Bloodstream infection

An infection which is not related to infection at another site and which meets at least one of the following criteria:

- a. Patient has a recognised pathogen cultured from blood cultures which is not related to an infection at another site
- b. Patient has at least one of the following signs or symptoms: fever (>38°C), chills, or hypotension and at least one of the following:
  - i. common skin contaminant cultured from two or more blood cultures drawn on separate occasions
  - ii. common skin contaminant cultured from at least one blood culture from a patient with an intravascular line, and a physician starts antimicrobial therapy
  - iii. positive blood antigen test

### V. Acute Respiratory Distress Syndrome (ARDS)

Respiratory failure, or new or worsening respiratory symptoms, commencing within one week of surgery; and a chest radiograph or computed tomography scan which demonstrates bilateral opacities not fully explained by effusions, lobar/lung collapse, or nodules; and respiratory failure not fully explained by cardiac failure or fluid overload. Need objective assessment (e.g. echocardiography) to exclude hydrostatic oedema if no risk factor is present.

Severity grading:

Severe: PaO<sub>2</sub>:FiO<sub>2</sub> ≤100 mmHg with PEEP ≥5 cmH<sub>2</sub>O

Guidance:

If altitude is higher than 1000 m, a correction factor should be calculated as follows: (PaO<sub>2</sub>:FiO<sub>2</sub> x [barometric pressure/760 mmHg]). PEEP, positive end-expiratory pressure; CPAP, non-invasive continuous positive airways pressure

VI. Pneumonia

Chest radiographs with new or progressive and persistent infiltrates, or consolidation, or cavitation, and at least one of the following:

- a. fever (>38°C) with no other recognized cause
- b. leucopaenia (<4,000 white blood cells/mm<sup>3</sup>) or leucocytosis (>12,000 white blood cells/mm<sup>3</sup>)
- c. for adults >70 years old, altered mental status with no other recognised cause;
- d. and at least two of the following:
  - i. new onset of purulent sputum or change in character of sputum, or increased respiratory secretions, or increased suctioning requirements
  - ii. new onset or worsening cough, or dyspnoea, or tachypnoea
  - iii. rales or bronchial breath sounds
  - iv. worsening gas exchange (hypoxaemia, increased oxygen requirement or increased ventilator demand)

Guidance: Two radiographs are required for patients with underlying pulmonary or cardiac disease. The definition may be used to identify ventilator associated pneumonia.

VII. Urinary tract infection

An infection associated with at least one of the following signs or symptoms which should be identified within a 24 hour period; fever (>38 °C), urgency, frequency, dysuria, suprapubic tenderness, costovertebral angle pain or tenderness with no other recognised cause, and a positive urine culture of ≥10<sup>5</sup> colony forming units/mL with no more than two species of microorganisms.

VIII. Acute Kidney Injury (AKI)

| Acute Kidney Injury (AKI) Stage | Serum creatinine                                                                                                                                                                                  | Urine output                                           |
|---------------------------------|---------------------------------------------------------------------------------------------------------------------------------------------------------------------------------------------------|--------------------------------------------------------|
| Severe                          | Increase of 3.0 times baseline within 7 days or increase in serum creatinine to ≥4.0 mg/dL (≥354 μmol/L) with an acute rise of >0.5 mg/dL (>44 μmol/L) or initiation of renal replacement therapy | ≤0.3 ml/kg/h for 24 hours<br>or<br>Anuria for 12 hours |

Guidance: Baseline serum creatinine must be measured before surgery but an estimated value can be used if the patient does not have chronic kidney disease.

IX. Postoperative haemorrhage

Blood loss occurring within 72 hours after the end of surgery which would normally result in transfusion of blood.

X. Cardiac arrest

The cessation of cardiac mechanical activity, as confirmed by the absence of signs of circulation. ECG changes may corroborate the incidence of cardiac arrest.

XI. Other severe complications

If any of the following complications result in a significant prolongation of hospital stay and/or permanent functional limitation or death, then mark 'Other severe complication' as 'Yes'. Note that they will almost always requires clinical treatment.

- a. Anastomotic breakdown

Leak of luminal contents from a surgical connection between two hollow viscera. The luminal contents may emerge either through the wound or at the drain site, or they may collect near the anastomosis, causing fever, abscess, septicaemia, metabolic disturbance and/or multiple-organ failure. The escape of luminal contents from the site of the anastomosis into an adjacent localised area, detected by imaging, in the absence of clinical symptoms and signs should be recorded as a sub-clinical leak.

- b. Arrhythmia

Electrocardiograph (ECG) evidence of cardiac rhythm disturbance.

- c. (Cardiogenic) pulmonary oedema

Evidence of fluid accumulation in the alveoli due to poor cardiac function.

- d. Gastro-intestinal bleed

Unambiguous clinical or endoscopic evidence of blood in the gastro-intestinal tract. Upper gastrointestinal bleeding is that originating from the oesophagus, stomach and duodenum. Lower gastro-intestinal bleeding originates from the small bowel and colon.

- e. Myocardial infarction

Increase in serum cardiac biomarker values (preferably cardiac troponin) with at least one value above the 99th percentile upper reference limit and at least one of the following criteria:

- i. Symptoms of ischaemia
- ii. New or presumed new ST-segment or T-wave ECG changes or new left bundle branch block
- iii. Development of pathological Q-waves on ECG

- iv. Radiological or echocardiographic evidence of new loss of viable myocardium or new regional wall motion abnormality
- v. Identification of an intra-coronary thrombus at angiography or autopsy

f. Pulmonary embolism (PE)

A new blood clot or thrombus within the pulmonary arterial system.

Guidance: Appropriate diagnostic tests include scintigraphy and CT angiography. Plasma D-dimer measurement is not recommended as a diagnostic test in the first three weeks following surgery.

I. Stroke

Embolic, thrombotic, or haemorrhagic cerebral event with persistent residual motor, sensory, or cognitive dysfunction (e.g. hemiplegia, hemiparesis, aphasia, sensory deficit, impaired memory).

**Reference**

1. Jammer I, Wickboldt N, Sander M, et al. Standards for definitions and use of outcome measures for clinical effectiveness research in perioperative medicine: European Perioperative Clinical Outcome (EPCO) definitions: a statement from the ESA-ESICM joint taskforce on perioperative outcome measures. *Eur J Anaesthesiol* 2015;32(2):88-105. doi: 10.1097/EJA.000000000000118

## Supplementary Material S9. The ASOS-2 trial design

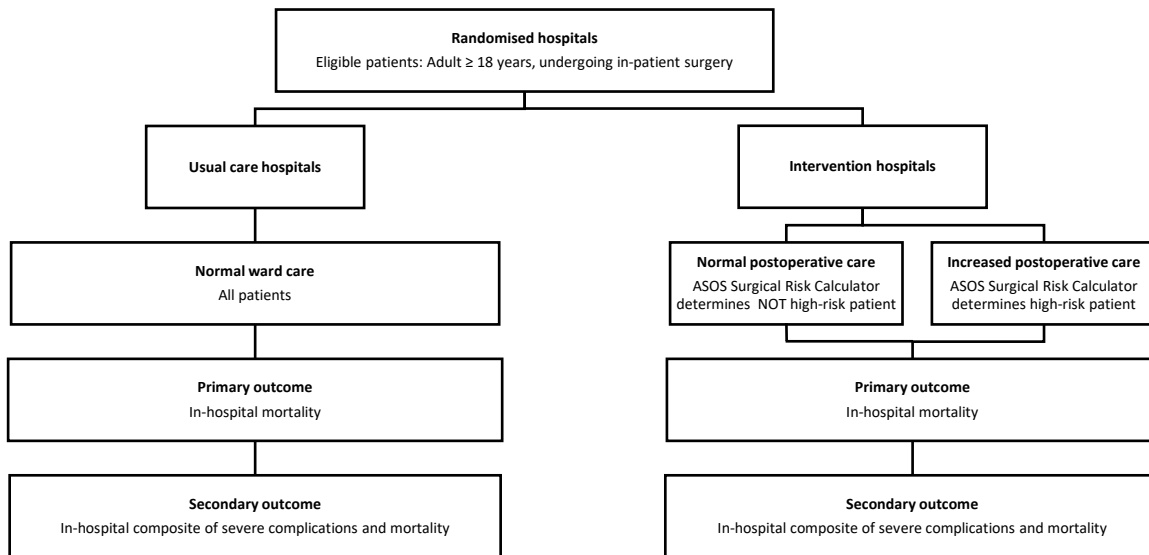

**Supplementary Material S10: Sample size calculations for the ASOS-2 Trial based on a power of 80%, 2-sided  $\alpha = 0.05$  and a mean cluster size of 100 patients**

| <b>Primary outcome (in-hospital all-cause mortality)</b> |                         |                      |                                                    |                                     |                       |
|----------------------------------------------------------|-------------------------|----------------------|----------------------------------------------------|-------------------------------------|-----------------------|
| <b>Control event rate</b>                                | <b>Intervention arm</b> | <b>Relative risk</b> | <b>Intra-cluster correlation coefficient (ICC)</b> | <b>Coefficient of variance (CV)</b> | <b>Total clusters</b> |
| 2.0%                                                     | 1.5%                    | 0.75                 | 0.015                                              | 0                                   | 536                   |
| 2.0%                                                     | 1.5%                    | 0.75                 | 0.015                                              | 0.63                                | 664                   |
| 2.0%                                                     | 1.6%                    | 0.80                 | 0.015                                              | 0.63                                | 1068                  |

## Supplementary Material S11. Prespecified sensitivity and subgroup analyses

Other prespecified sensitivity and subgroup analyses on the effectiveness outcomes were also conducted; i) the potential impact of unobserved outcomes on the primary and secondary effectiveness estimates, ii) subgroups treated as stratification variables; including hospital level, recruitment wave, and income category of country, and iii) analysis stratified by individual patient and surgical characteristics that form part of the ASOS Surgical Risk Calculator. The full prespecified additional secondary analyses are shown below.

The following prespecified sensitivity and subgroup analyses on the effectiveness outcomes were also conducted.

1. Sensitivity analyses investigated the potential impact of unobserved outcomes (transfer out or lost to follow up) on the primary and secondary effectiveness estimates, where individuals with unobserved outcomes were alternately assumed to be alive at discharge (censored at thirty days) or to have died in-hospital within 30 days.
  2. Primary endpoints were also analysed under the same model as the primary analysis for the following subgroups treated as stratification variables: i) hospital level (primary, secondary, tertiary), ii) recruitment wave, and iii) income category of country (low or middle, according to the World Bank classification in 2020).
  3. The relative risk of experiencing the primary and secondary outcome by exposure to the intervention (defined below) was estimated in stratified models for the following individual characteristics: i) age (years), ii) American Society of Anesthesiologists (ASA) status (1-5), iii) surgical procedure category (gynaecologic, obstetric, neurosurgery, ear nose and throat (ENT), orthopaedic, plastics and breast, urology, gastrointestinal and hepatobiliary, cardio-thoracics, and other), iv) indication for surgery (non-communicable disease, caesarean section, trauma, infection), v) urgency of surgery (elective, urgent, emergent), and vi) severity of surgery (minor, intermediate, major).
- (Secondary analyses included two analytic approaches to two per protocol populations, based on implementation fidelity. In the first per protocol analysis, we compared all patients from hospitals with data in the standard of care arm to all patients from hospitals with data in the intervention arm where the intervention hospital provided the intervention with fidelity to at least 80% of high-risk patients. Patients from hospitals in the intervention arm where the hospital delivered the intervention with fidelity to fewer than 80% of patients will be excluded from this analysis. In the second per protocol analysis, we compared all patients from hospitals with data in the standard of care arm to all patients from hospitals in the top two tertiles of implementation fidelity. Patients from intervention hospitals in the bottom tertile of implementation fidelity were excluded from this analysis. At the hospital level we report implementation fidelity as the proportion of high-risk patients who received the intervention with fidelity. We used two definitions for implementation fidelity; i) provision of at least the high-risk bedside guide plus one additional component of the intervention on days 0 and 1 postoperatively and ii) provision of at least 2 components of the intervention on days 0 and days 1 postoperatively, regardless whether the high-risk bedside guide is one of the components.)

**Supplementary Table S1. Hospitals and participants recruited per randomisation wave in the trial**

| <b>Randomisation wave</b> | <b>Hospitals<br/>(n=332)</b> | <b>Patients<br/>(n=28855)</b> |
|---------------------------|------------------------------|-------------------------------|
| Wave 1                    | 63 (19.0%)                   | 6479 (22.5%)                  |
| Wave 2                    | 39 (11.7%)                   | 2269 (7.9%)                   |
| Wave 3                    | 35 (10.5%)                   | 985 (3.4%)                    |
| Wave 4                    | 55 (16.6%)                   | 7025 (24.3%)                  |
| Wave 5                    | 66 (19.9%)                   | 5964 (20.7%)                  |
| Wave 6                    | 13 (3.9%)                    | 1047 (3.6%)                   |
| Wave 7                    | 10 (3.0%)                    | 984 (3.4%)                    |
| Wave 8                    | 6 (1.8%)                     | 597 (2.1%)                    |
| Wave 9                    | 4 (1.2%)                     | 320 (1.1%)                    |
| Wave 10                   | 19 (5.7%)                    | 1238 (4.3%)                   |
| Wave 11                   | 22 (6.6%)                    | 1947 (6.7%)                   |



**Supplementary Table S2. Hospitals recruited in the trial**

|           | <b>All patients<br/>(n=28892)</b> | <b>Increased postoperative surveillance group<br/>(n=13275)</b> | <b>Standard of care group<br/>(n=15617)</b> |
|-----------|-----------------------------------|-----------------------------------------------------------------|---------------------------------------------|
| Primary   | 3846 (13.3%)                      | 1977 (14.9%)                                                    | 1869 (12.0%)                                |
| Secondary | 10094 (35.0%)                     | 4442 (33.5%)                                                    | 5652 (36.3%)                                |
| Tertiary  | 14952 (51.8%)                     | 6856 (51.6%)                                                    | 8096 (51.8%)                                |

**Supplementary Table S3. Physician surgeons, anaesthesiologists and obstetricians, and the number of operating theatres in hospitals recruited in the trial**

|                             | <b>All hospitals<br/>(n=169)</b> | <b>Increased postoperative surveillance group<br/>(n=76)</b> | <b>Standard of care group<br/>(n=93)</b> | <b>p-value</b> |
|-----------------------------|----------------------------------|--------------------------------------------------------------|------------------------------------------|----------------|
| <b>Primary hospitals</b>    | n=36                             | n=14                                                         | n=22                                     |                |
| Physician surgeon           | 1 (0-4)                          | 2 (0-3)                                                      | 1 (0-6)                                  | 0.74           |
| Physician anaesthesiologist | 2 (0-5)                          | 3 (2-7)                                                      | 1 (0-5)                                  | 0.10           |
| Physician obstetrician      | 2 (0-4)                          | 3 (0-4)                                                      | 1 (0-5)                                  | 0.58           |
| <b>Secondary hospitals</b>  | n=60                             | n=27                                                         | n=33                                     |                |
| Physician surgeon           | 4 (1-9)                          | 4 (1-7)                                                      | 4 (0-10)                                 | 0.81           |
| Physician anaesthesiologist | 4 (0-8)                          | 5 (0-9)                                                      | 2 (0-9)                                  | 0.54           |
| Physician obstetrician      | 4 (1-8)                          | 4 (1-8)                                                      | 3 (0-9)                                  | 0.71           |
| <b>Tertiary hospitals</b>   | n=73                             | n=35                                                         | n=38                                     |                |
| Physician surgeon           | 8 (2-25)                         | 8 (3-25)                                                     | 8 (1-24)                                 | 0.49           |
| Physician anaesthesiologist | 8 (2-16)                         | 8 (2-18)                                                     | 7 (1-15)                                 | 0.34           |
| Physician obstetrician      | 9 (3-20)                         | 8 (2-20)                                                     | 10 (1-19)                                | 0.94           |

**Supplementary Table S4. ASOS Surgical Risk Calculator Scores in participating patients**

|         | <b>All patients<br/>(n=28892)</b> | <b>Enhanced postoperative surveillance group<br/>(n=13275)</b> | <b>Standard of care group<br/>(n=15617)</b> |
|---------|-----------------------------------|----------------------------------------------------------------|---------------------------------------------|
| Missing | 936                               | 261                                                            | 675                                         |
| -3      | 141 (0.5%)                        | 100 (0.8%)                                                     | 41 (0.3%)                                   |
| -2      | 58 (0.2%)                         | 23 (0.2%)                                                      | 35 (0.2%)                                   |
| -1      | 373 (1.3%)                        | 176 (1.4%)                                                     | 197 (1.3%)                                  |
| 0       | 653 (2.3%)                        | 275 (2.1%)                                                     | 378 (2.5%)                                  |
| 1       | 931 (3.3%)                        | 438 (3.4%)                                                     | 493 (3.3%)                                  |
| 2       | 2302 (8.2%)                       | 970 (7.5%)                                                     | 1332 (8.9%)                                 |
| 3       | 2537 (9.1%)                       | 1176 (9.0%)                                                    | 1361 (9.1%)                                 |
| 4       | 2643 (9.5%)                       | 1289 (9.9%)                                                    | 1354 (9.1%)                                 |
| 5       | 3813(13.6%)                       | 1737 (13.1%)                                                   | 2076 (13.9%)                                |
| 6       | 3093(11.1%)                       | 1499 (11.5%)                                                   | 1594 (10.2%)                                |
| 7       | 2292 (8.2%)                       | 1110 (8.5%)                                                    | 1182 (7.9%)                                 |
| 8       | 2214 (7.9%)                       | 1028 (7.9%)                                                    | 1186 (7.9%)                                 |
| 9       | 1336 (4.8%)                       | 648 (5.0%)                                                     | 688 (4.6%)                                  |
| 10      | 1186 (4.2%)                       | 527 (4.0%)                                                     | 659 (4.4%)                                  |
| 11      | 1118 (4.0%)                       | 513 (3.9%)                                                     | 605 (4.0%)                                  |
| 12      | 752 (2.7%)                        | 358 (2.8%)                                                     | 394 (2.6%)                                  |
| 13      | 694 (2.5%)                        | 322 (2.5%)                                                     | 372 (2.5%)                                  |
| 14      | 489 (1.7%)                        | 225 (1.7%)                                                     | 264 (1.8%)                                  |
| 15      | 311 (1.1%)                        | 149 (1.1%)                                                     | 162 (1.1%)                                  |
| 16      | 302 (1.1%)                        | 117 (0.9%)                                                     | 185 (1.2%)                                  |
| 17      | 199 (0.7%)                        | 104 (0.8%)                                                     | 95 (0.6%)                                   |
| 18      | 178 (0.6%)                        | 85 (0.7%)                                                      | 93 (0.6%)                                   |
| 19      | 125 (0.4%)                        | 65 (0.5%)                                                      | 60 (0.4%)                                   |
| 20      | 87 (0.3%)                         | 28 (0.2%)                                                      | 59 (0.4%)                                   |
| 21      | 78 (0.3%)                         | 34 (0.3%)                                                      | 44 (0.3%)                                   |
| 22      | 44 (0.2%)                         | 14 (0.1%)                                                      | 30 (0.2%)                                   |
| 23      | 3 (0.0%)                          | 3 (0.0%)                                                       | 0 (0.0%)                                    |
| 24      | 4 (0.0%)                          | 1 (0.0%)                                                       | 3 (0.0%)                                    |

**Supplementary Table S5. Number of postoperative surveillance interventions provided to high-risk patients**

|                     | <b>Day 0</b> | <b>Day 1</b> |
|---------------------|--------------|--------------|
| No intervention     | 66 (2.6%)    | 123 (4.8%)   |
| One intervention    | 244 (9.6%)   | 319 (12.5%)  |
| Two interventions   | 345 (13.5%)  | 402 (15.8%)  |
| Three interventions | 603 (23.7%)  | 554 (21.7%)  |
| Four interventions  | 879 (34.5%)  | 814 (31.9%)  |
| Five interventions  | 411 (16.1%)  | 336 (13.2%)  |

**Supplementary Table S6. Sensitivity analyses of the potential impact of unobserved outcomes on the primary and secondary effectiveness estimates, where individuals with unobserved outcomes were alternately assumed to be alive at discharge (censored at thirty days) or to have died in-hospital within 30 days**

| <b>Sensitivity analysis</b>       | <b>Relative risk</b> | <b>2.5% confidence interval</b> | <b>97.5% confidence interval</b> | <b>p-value</b> |
|-----------------------------------|----------------------|---------------------------------|----------------------------------|----------------|
| <i>Primary outcome</i>            |                      |                                 |                                  |                |
| Unobserved outcomes assumed alive | 0.96                 | 0.69                            | 1.32                             | 0.79           |
| Unobserved outcomes assumed dead  | 1.13                 | 0.67                            | 1.91                             | 0.65           |
| <i>Secondary outcome</i>          |                      |                                 |                                  |                |
| Unobserved outcomes assumed alive | 0.92                 | 0.73                            | 1.17                             | 0.50           |
| Unobserved outcomes assumed dead  | 1.07                 | 0.82                            | 1.38                             | 0.63           |

**Supplementary Table S7. Per protocol analyses of enhanced postoperative surveillance implementation fidelity to decrease in-hospital mortality.**

|                                                                                                                                                             | Fidelity definition 1:<br>(High-risk individuals exposed to the bedside guide plus at least 1 additional component of the intervention) | Fidelity definition 2:<br>(High-risk individuals exposed to at least any 2 components of the intervention) |
|-------------------------------------------------------------------------------------------------------------------------------------------------------------|-----------------------------------------------------------------------------------------------------------------------------------------|------------------------------------------------------------------------------------------------------------|
| Per protocol population 1: (Intervention hospitals where $\geq 80\%$ of high-risk patients received the intervention with fidelity)                         | RR 1.20, 95% CI 0.76-1.88<br>p-value 0.44                                                                                               | RR 1.12, 95% CI 0.75-1.67<br>p-value 0.58                                                                  |
| Per protocol population 2: (Top two tertiles of intervention hospitals ranked according to proportion of patients receiving the intervention with fidelity) | RR 1.07, 95% CI 0.75-1.53<br>p-value 0.69                                                                                               | RR 1.17, 95% CI: 0.82-1.67<br>p-value 0.38                                                                 |

RR relative risk, CI confidence interval

**Supplementary Table S8. Per protocol analyses of enhanced postoperative surveillance implementation fidelity to decrease in-hospital severe complications and death**

|                                                                                                                                                             | Fidelity definition 1:<br>(High-risk individuals exposed to the bedside guide plus at least 1 additional component of the intervention) | Fidelity definition 2:<br>(High-risk individuals exposed to at least any 2 components of the intervention) |
|-------------------------------------------------------------------------------------------------------------------------------------------------------------|-----------------------------------------------------------------------------------------------------------------------------------------|------------------------------------------------------------------------------------------------------------|
| Per protocol population 1: (Intervention hospitals where $\geq 80\%$ of high-risk patients received the intervention with fidelity)                         | RR 1.16, 95% CI 0.88-1.53<br>p-value 0.30                                                                                               | RR 1.10, 95% CI 0.85-1.43<br>p-value 0.46                                                                  |
| Per protocol population 2: (Top two tertiles of intervention hospitals ranked according to proportion of patients receiving the intervention with fidelity) | RR 1.07, 95% CI 0.84-1.36<br>p-value 0.58                                                                                               | RR 1.06, 95% CI 0.83-1.35<br>p-value 0.66                                                                  |

RR relative risk, CI confidence interval

**Supplementary Table S9. Stratified models for primary effectiveness outcome associated with enhanced postoperative surveillance**

| <b>Strata</b>                  | <b>Relative risk</b> | <b>2.5% confidence interval</b> | <b>97.5% confidence interval</b> | <b>p-value</b> |
|--------------------------------|----------------------|---------------------------------|----------------------------------|----------------|
| <i>Hospital level</i>          |                      |                                 |                                  |                |
| Primary                        | 1.68                 | 0.53                            | 5.32                             | 0.38           |
| Secondary                      | 0.98                 | 0.52                            | 1.84                             | 0.96           |
| Tertiary                       | 0.86                 | 0.59                            | 1.26                             | 0.44           |
| <i>Randomisation wave</i>      |                      |                                 |                                  |                |
| Wave 1                         | 1.24                 | 0.56                            | 2.77                             | 0.60           |
| Wave 2                         | 2.41                 | 0.57                            | 10.30                            | 0.23           |
| Wave 3                         | 0.25                 | 0.04                            | 1.49                             | 0.13           |
| Wave 4                         | 2.12                 | 0.68                            | 6.60                             | 0.19           |
| Wave 5                         | 0.35                 | 0.07                            | 1.70                             | 0.19           |
| Wave 6                         | 1.18                 | 0.60                            | 2.34                             | 0.63           |
| Wave 7                         | 1.89                 | 0.79                            | 4.51                             | 0.15           |
| Wave 8                         | 0.86                 | 0.46                            | 1.60                             | 0.63           |
| Wave 9                         | 0.72                 | 0.20                            | 2.60                             | 0.62           |
| Wave 10                        | 0.44                 | 0.14                            | 1.43                             | 0.17           |
| Wave 11                        | 0.66                 | 0.11                            | 4.10                             | 0.66           |
| <i>Country income category</i> |                      |                                 |                                  |                |
| Low                            | 1.04                 | 0.69                            | 1.58                             | 0.84           |
| Middle                         | 0.56                 | 0.23                            | 1.39                             | 0.21           |
| High                           | 0.91                 | 0.50                            | 1.66                             | 0.76           |



**Supplementary Table S10. Sensitivity analyses for primary effectiveness outcome associated with enhanced postoperative surveillance**

| Model                            | Strata                              | Relative risk | 2.5% confidence interval | 97.5% confidence interval | p-value |
|----------------------------------|-------------------------------------|---------------|--------------------------|---------------------------|---------|
| <i>Per protocol definition 1</i> |                                     |               |                          |                           |         |
| <i>Fidelity definition 1</i>     |                                     |               |                          |                           |         |
| <i>Age</i>                       |                                     |               |                          |                           |         |
|                                  | 18-29                               | 1.60          | 0.76                     | 3.36                      | 0.22    |
|                                  | 30-69                               | 1.10          | 0.70                     | 1.72                      | 0.69    |
|                                  | ≥70                                 | 1.17          | 0.51                     | 2.68                      | 0.72    |
| <i>ASA category</i>              |                                     |               |                          |                           |         |
|                                  | ASA-all                             | 1.16          | 0.76                     | 1.75                      | 0.49    |
|                                  | ASA 1                               | 1.71          | 0.58                     | 5.10                      | 0.33    |
|                                  | ASA 2                               | 1.85          | 0.86                     | 4.02                      | 0.12    |
|                                  | ASA 3                               | 1.41          | 0.88                     | 2.27                      | 0.16    |
|                                  | ASA 4                               | 0.47          | 0.19                     | 1.14                      | 0.10    |
|                                  | ASA 5                               | 1.83          | 0.46                     | 7.25                      | 0.39    |
| <i>Grade of surgery</i>          |                                     |               |                          |                           |         |
|                                  | Severity-all                        | 1.16          | 0.76                     | 1.75                      | 0.49    |
|                                  | Minor                               | 2.48          | 0.47                     | 13.09                     | 0.28    |
|                                  | Intermediate                        | 1.28          | 0.63                     | 2.63                      | 0.50    |
|                                  | Severe                              | 0.99          | 0.63                     | 1.56                      | 0.97    |
| <i>Urgency of surgery</i>        |                                     |               |                          |                           |         |
|                                  | Urgency-all                         | 1.16          | 0.76                     | 1.75                      | 0.49    |
|                                  | Elective                            | 2.87          | 1.15                     | 7.13                      | 0.02    |
|                                  | Urgent                              | 1.12          | 0.56                     | 2.22                      | 0.75    |
|                                  | Emergency                           | 0.87          | 0.53                     | 1.43                      | 0.59    |
| <i>Surgical speciality</i>       |                                     |               |                          |                           |         |
|                                  | Gynaecology                         | 3.33          | 0.80                     | 13.85                     | 0.10    |
|                                  | Obstetrics                          | 0.69          | 0.23                     | 2.02                      | 0.49    |
|                                  | Orthopaedic                         | 1.06          | 0.35                     | 3.24                      | 0.92    |
|                                  | Ear- nose and throat                | 3.41          | 0.63                     | 18.37                     | 0.15    |
|                                  | Plastics and Breast                 | 2.02          | 0.21                     | 19.77                     | 0.55    |
|                                  | Neurosurgery                        | 1.92          | 0.61                     | 6.06                      | 0.27    |
|                                  | Gastro-intestinal or Hepato-biliary | 1.14          | 0.66                     | 1.97                      | 0.64    |
|                                  | Cardiothoracic or Vascular          | 0.26          | 0.03                     | 2.07                      | 0.20    |
|                                  | Other                               | 0.47          | 0.06                     | 3.76                      | 0.48    |
| <i>Indication for surgery</i>    |                                     |               |                          |                           |         |
|                                  | Non-communicable disease            | 1.49          | 0.81                     | 2.76                      | 0.20    |
|                                  | Caesarean section                   | 0.59          | 0.17                     | 2.08                      | 0.41    |
|                                  | Trauma                              | 0.73          | 0.31                     | 1.70                      | 0.46    |
|                                  | Infection                           | 1.00          | 0.53                     | 1.89                      | 1.00    |
| <i>Per protocol definition 1</i> |                                     |               |                          |                           |         |
| <i>Fidelity definition 2</i>     |                                     |               |                          |                           |         |
| <i>Age</i>                       |                                     |               |                          |                           |         |

|                                                            |                                     |      |      |       |      |
|------------------------------------------------------------|-------------------------------------|------|------|-------|------|
|                                                            | 18-29                               | 1.35 | 0.67 | 2.74  | 0.40 |
|                                                            | 30-69                               | 1.16 | 0.78 | 1.70  | 0.46 |
|                                                            | ≥70                                 | 1.03 | 0.49 | 2.19  | 0.94 |
| <i>ASA category</i>                                        |                                     |      |      |       |      |
|                                                            | ASA-all                             | 1.12 | 0.78 | 1.61  | 0.53 |
|                                                            | ASA 1                               | 1.64 | 0.60 | 4.47  | 0.33 |
|                                                            | ASA 2                               | 1.58 | 0.77 | 3.26  | 0.21 |
|                                                            | ASA 3                               | 1.38 | 0.89 | 2.15  | 0.15 |
|                                                            | ASA 4                               | 0.60 | 0.31 | 1.19  | 0.14 |
|                                                            | ASA 5                               | 1.20 | 0.25 | 5.76  | 0.82 |
| <i>Grade of surgery</i>                                    |                                     |      |      |       |      |
|                                                            | Severity-all                        | 1.12 | 0.78 | 1.61  | 0.53 |
|                                                            | Minor                               | 2.81 | 0.68 | 11.57 | 0.15 |
|                                                            | Intermediate                        | 1.21 | 0.64 | 2.29  | 0.55 |
|                                                            | Severe                              | 0.98 | 0.65 | 1.46  | 0.92 |
| <i>Urgency of surgery</i>                                  |                                     |      |      |       |      |
|                                                            | Urgency-all                         | 1.12 | 0.78 | 1.61  | 0.54 |
|                                                            | Elective                            | 2.44 | 1.07 | 5.59  | 0.03 |
|                                                            | Urgent                              | 1.12 | 0.61 | 2.07  | 0.71 |
|                                                            | Emergency                           | 0.88 | 0.57 | 1.38  | 0.59 |
| <i>Surgical speciality</i>                                 |                                     |      |      |       |      |
|                                                            | Gynaecology                         | 2.53 | 0.63 | 10.06 | 0.19 |
|                                                            | Obstetrics                          | 0.62 | 0.22 | 1.74  | 0.36 |
|                                                            | Orthopaedic                         | 0.98 | 0.36 | 2.68  | 0.97 |
|                                                            | Ear- nose and throat                | 3.37 | 0.67 | 16.92 | 0.14 |
|                                                            | Plastics and Breast                 | 1.52 | 0.15 | 14.91 | 0.72 |
|                                                            | Neurosurgery                        | 1.85 | 0.67 | 5.08  | 0.23 |
|                                                            | Gastro-intestinal or Hepato-biliary | 1.08 | 0.66 | 1.77  | 0.76 |
|                                                            | Cardiothoracic or Vascular          | 0.42 | 0.09 | 1.88  | 0.26 |
|                                                            | Other                               | 0.95 | 0.27 | 3.30  | 0.94 |
| <i>Indication for surgery</i>                              |                                     |      |      |       |      |
|                                                            | Non-communicable disease            | 1.40 | 0.82 | 2.41  | 0.22 |
|                                                            | Caesarean section                   | 0.46 | 0.13 | 1.63  | 0.23 |
|                                                            | Trauma                              | 0.82 | 0.38 | 1.78  | 0.62 |
|                                                            | Infection                           | 1.02 | 0.60 | 1.74  | 0.94 |
| <i>Per protocol definition 2<br/>Fidelity definition 1</i> |                                     |      |      |       |      |
| <i>Age</i>                                                 | 18-29                               | 1.49 | 0.79 | 2.80  | 0.22 |
|                                                            | 30-69                               | 1.05 | 0.74 | 1.49  | 0.78 |
|                                                            | ≥70                                 | 1.05 | 0.56 | 1.96  | 0.88 |
| <i>ASA category</i>                                        |                                     |      |      |       |      |
|                                                            | ASA-all                             | 1.07 | 0.78 | 1.48  | 0.66 |
|                                                            | ASA 1                               | 1.32 | 0.50 | 3.47  | 0.58 |

|                                  |                                     |      |      |       |      |
|----------------------------------|-------------------------------------|------|------|-------|------|
|                                  | ASA 2                               | 1.61 | 0.88 | 2.95  | 0.12 |
|                                  | ASA 3                               | 1.22 | 0.81 | 1.82  | 0.34 |
|                                  | ASA 4                               | 0.68 | 0.38 | 1.21  | 0.19 |
|                                  | ASA 5                               | 1.33 | 0.43 | 4.15  | 0.62 |
| <i>Grade of surgery</i>          |                                     |      |      |       |      |
|                                  | Severity-all                        | 1.07 | 0.78 | 1.48  | 0.66 |
|                                  | Minor                               | 1.44 | 0.38 | 5.47  | 0.59 |
|                                  | Intermediate                        | 1.15 | 0.67 | 2.00  | 0.61 |
|                                  | Severe                              | 1.03 | 0.72 | 1.48  | 0.87 |
| <i>Urgency of surgery</i>        |                                     |      |      |       |      |
|                                  | Urgency-all                         | 1.07 | 0.78 | 1.48  | 0.66 |
|                                  | Elective                            | 1.92 | 0.88 | 4.19  | 0.10 |
|                                  | Urgent                              | 1.05 | 0.62 | 1.79  | 0.85 |
|                                  | Emergency                           | 0.97 | 0.64 | 1.47  | 0.90 |
| <i>Surgical speciality</i>       |                                     |      |      |       |      |
|                                  | Gynaecology                         | 2.10 | 0.52 | 8.49  | 0.30 |
|                                  | Obstetrics                          | 0.53 | 0.18 | 1.55  | 0.25 |
|                                  | Orthopaedic                         | 0.67 | 0.25 | 1.80  | 0.43 |
|                                  | Ear- nose and throat                | 2.58 | 0.58 | 11.50 | 0.22 |
|                                  | Plastics and Breast                 | 1.54 | 0.26 | 9.15  | 0.63 |
|                                  | Urology                             | 0.38 | 0.08 | 1.78  | 0.22 |
|                                  | Neurosurgery                        | 1.30 | 0.48 | 3.51  | 0.61 |
|                                  | Gastro-intestinal or Hepato-biliary | 1.16 | 0.76 | 1.76  | 0.49 |
|                                  | Cardiothoracic or Vascular          | 0.64 | 0.29 | 1.40  | 0.26 |
|                                  | Other                               | 1.06 | 0.36 | 3.13  | 0.92 |
| <i>Indication for surgery</i>    |                                     |      |      |       |      |
|                                  | Non-communicable disease            | 1.40 | 0.87 | 2.27  | 0.17 |
|                                  | Caesarean section                   | 0.40 | 0.11 | 1.47  | 0.17 |
|                                  | Trauma                              | 0.65 | 0.33 | 1.28  | 0.21 |
|                                  | Infection                           | 1.02 | 0.65 | 1.62  | 0.92 |
| <i>Per protocol definition 2</i> |                                     |      |      |       |      |
| <i>Fidelity definition 2</i>     |                                     |      |      |       |      |
| <i>Age</i>                       |                                     |      |      |       |      |
|                                  | 18-29                               | 1.54 | 0.82 | 2.90  | 0.18 |
|                                  | 30-69                               | 1.19 | 0.85 | 1.68  | 0.31 |
|                                  | ≥70                                 | 1.03 | 0.53 | 1.99  | 0.93 |
| <i>ASA category</i>              |                                     |      |      |       |      |
|                                  | ASA-all                             | 1.17 | 0.85 | 1.61  | 0.35 |
|                                  | ASA 1                               | 1.34 | 0.49 | 3.71  | 0.57 |
|                                  | ASA 2                               | 1.63 | 0.87 | 3.06  | 0.13 |
|                                  | ASA 3                               | 1.33 | 0.89 | 2.00  | 0.17 |
|                                  | ASA 4                               | 0.91 | 0.53 | 1.54  | 0.71 |
|                                  | ASA 5                               | 1.67 | 0.53 | 5.20  | 0.38 |
| <i>Grade of surgery</i>          |                                     |      |      |       |      |

|                               |                                     |      |      |       |      |
|-------------------------------|-------------------------------------|------|------|-------|------|
|                               | Severity-all                        | 1.17 | 0.85 | 1.61  | 0.35 |
|                               | Minor                               | 1.81 | 0.48 | 6.84  | 0.38 |
|                               | Intermediate                        | 1.28 | 0.72 | 2.25  | 0.40 |
|                               | Severe                              | 1.09 | 0.76 | 1.57  | 0.65 |
| <i>Urgency of surgery</i>     |                                     |      |      |       |      |
|                               | Urgency-all                         | 1.17 | 0.85 | 1.61  | 0.35 |
|                               | Elective                            | 2.10 | 0.96 | 4.55  | 0.06 |
|                               | Urgent                              | 1.11 | 0.65 | 1.93  | 0.70 |
|                               | Emergency                           | 1.06 | 0.70 | 1.60  | 0.79 |
| <i>Surgical speciality</i>    |                                     |      |      |       |      |
|                               | Gynaecology                         | 2.48 | 0.64 | 9.54  | 0.19 |
|                               | Obstetrics                          | 0.68 | 0.25 | 1.83  | 0.45 |
|                               | Orthopaedic                         | 0.87 | 0.34 | 2.18  | 0.76 |
|                               | Ear- nose and throat                | 2.49 | 0.56 | 11.16 | 0.23 |
|                               | Plastics and Breast                 | 1.84 | 0.31 | 10.80 | 0.50 |
|                               | Urology                             | 0.40 | 0.08 | 1.90  | 0.25 |
|                               | Neurosurgery                        | 1.50 | 0.57 | 3.97  | 0.41 |
|                               | Gastro-intestinal or Hepato-biliary | 1.21 | 0.79 | 1.86  | 0.39 |
|                               | Cardiothoracic or Vascular          | 0.55 | 0.22 | 1.36  | 0.19 |
|                               | Other                               | 1.35 | 0.45 | 4.03  | 0.59 |
| <i>Indication for surgery</i> |                                     |      |      |       |      |
|                               | Non-communicable disease            | 1.41 | 0.86 | 2.31  | 0.17 |
|                               | Caesarean section                   | 0.43 | 0.12 | 1.55  | 0.20 |
|                               | Trauma                              | 0.94 | 0.51 | 1.77  | 0.86 |
|                               | Infection                           | 1.09 | 0.68 | 1.74  | 0.73 |

Per protocol definition 1; where the intervention hospital provided the intervention with fidelity to at least 80% of high-risk patients

Per protocol definition 2; hospitals in the top two tertiles of implementation fidelity

Fidelity definition 1; provision of at least the high-risk bedside guide plus one additional component of the intervention on days 0 and 1 postoperatively

Fidelity definition 2; provision of at least any two components of the intervention on days 0 and days 1 postoperatively, which did not necessarily have to include the high-risk bedside guide as one of the components

ASA=American Society of Anesthesiologists

**Supplementary Table S11. Sensitivity analyses for primary effectiveness outcome associated with enhanced postoperative surveillance for high-risk patients**

| Model stratification          | Strata                              | Relative risk | 2.5% confidence interval | 97.5% confidence interval | p-value |
|-------------------------------|-------------------------------------|---------------|--------------------------|---------------------------|---------|
| <i>Age</i>                    |                                     |               |                          |                           |         |
|                               | 18-29                               | 1.34          | 0.73                     | 2.47                      | 0.35    |
|                               | 30-69                               | 1.14          | 0.82                     | 1.56                      | 0.44    |
|                               | ≥70                                 | 0.97          | 0.54                     | 1.76                      | 0.93    |
| <i>ASA category</i>           |                                     |               |                          |                           |         |
|                               | ASA-all                             | 1.09          | 0.81                     | 1.47                      | 0.59    |
|                               | ASA 1                               | 1.19          | 0.47                     | 3.02                      | 0.71    |
|                               | ASA 2                               | 1.59          | 0.91                     | 2.78                      | 0.10    |
|                               | ASA 3                               | 1.24          | 0.84                     | 1.83                      | 0.27    |
|                               | ASA 4                               | 0.69          | 0.41                     | 1.15                      | 0.16    |
|                               | ASA 5                               | 1.62          | 0.56                     | 4.66                      | 0.37    |
| <i>Grade of surgery</i>       |                                     |               |                          |                           |         |
|                               | Severity-all                        | 1.09          | 0.81                     | 1.47                      | 0.59    |
|                               | Minor                               | 1.40          | 0.40                     | 4.90                      | 0.60    |
|                               | Intermediate                        | 1.25          | 0.75                     | 2.09                      | 0.39    |
|                               | Severe                              | 1.04          | 0.74                     | 1.46                      | 0.83    |
| <i>Urgency of surgery</i>     |                                     |               |                          |                           |         |
|                               | Urgency-all                         | 1.09          | 0.81                     | 1.47                      | 0.59    |
|                               | Elective                            | 1.74          | 0.83                     | 3.65                      | 0.15    |
|                               | Urgent                              | 0.98          | 0.59                     | 1.62                      | 0.94    |
|                               | Emergency                           | 1.08          | 0.74                     | 1.58                      | 0.69    |
| <i>Surgical speciality</i>    |                                     |               |                          |                           |         |
|                               | Gynaecology                         | 1.94          | 0.50                     | 7.59                      | 0.34    |
|                               | Obstetrics                          | 0.51          | 0.18                     | 1.40                      | 0.19    |
|                               | Orthopaedic                         | 0.62          | 0.25                     | 1.58                      | 0.32    |
|                               | Ear, nose and throat                | 2.38          | 0.54                     | 10.54                     | 0.25    |
|                               | Plastics and Breast                 | 1.21          | 0.20                     | 7.26                      | 0.83    |
|                               | Urology                             | 0.32          | 0.07                     | 1.50                      | 0.15    |
|                               | Neurosurgery                        | 1.33          | 0.54                     | 3.28                      | 0.53    |
|                               | Gastro-intestinal or Hepato-biliary | 1.25          | 0.85                     | 1.82                      | 0.26    |
|                               | Cardiothoracic or Vascular          | 0.57          | 0.26                     | 1.26                      | 0.17    |
|                               | Other                               | 0.99          | 0.36                     | 2.69                      | 0.98    |
| <i>Indication for surgery</i> |                                     |               |                          |                           |         |
|                               | Non-communicable disease            | 1.39          | 0.88                     | 2.18                      | 0.16    |
|                               | Caesarean section                   | 0.33          | 0.09                     | 1.20                      | 0.09    |
|                               | Trauma                              | 0.86          | 0.48                     | 1.56                      | 0.63    |
|                               | Infection                           | 1.00          | 0.65                     | 1.54                      | 0.99    |

ASA=American Society of Anesthesiologists

Supplementary Figure 1. The African Surgical OutcomeS-2 (ASOS-2) trial results

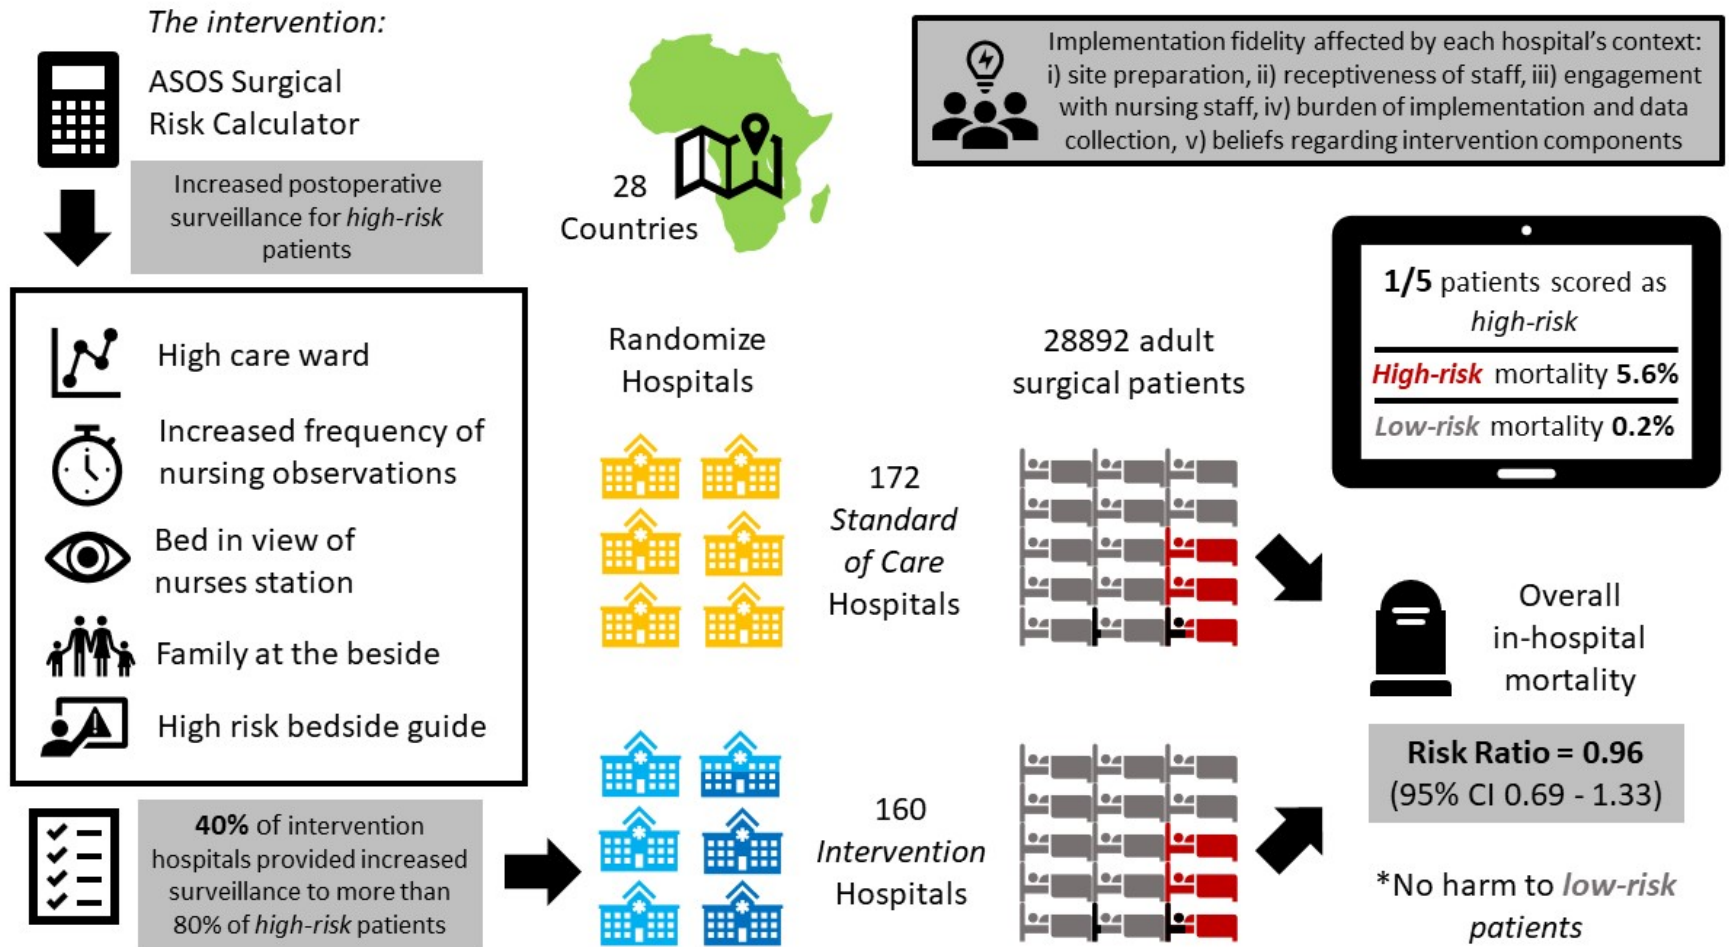

Supplement: mmc4.pdf [file mmc4.pdf]
